# Supplementary material for: Synthesis and structure of bicyclic enediynes via twofold carbenoid ring closure
Source: Royal Society of Chemistry journal article supplement (doi:10.1039/b101572a), 2001-01-01

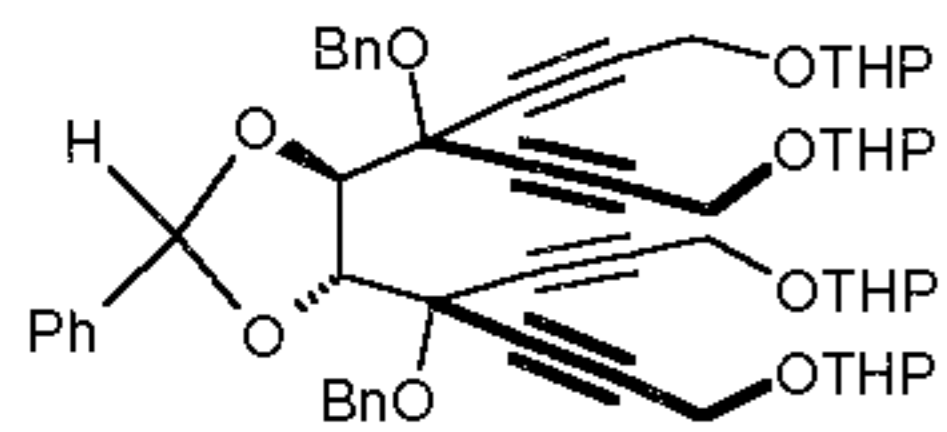

~~BRUKER~~

JU2119.113  
 AU PROG:  
 X00.AU  
 DATE 23-6-96  
 TIME 10:20

SA.NA KOB43749  
 SOLVENT CDC13  
 SF 400.134  
 SY 133.0  
 Q1 6908.850  
 SI 32768  
 TD 32768  
 SW 8064.516  
 HZ/PT .492

PW 0.0  
 RD 0.0  
 AQ 2.032  
 RG 8  
 NS 24  
 TE 297

FW 10100  
 Q2 0.0  
 DP 63L PO

LB 0.0  
 GB 0.0  
 CX 30.00  
 CY 18.00  
 F1 9.201P  
 F2 -.798P  
 HZ/CM 133.375  
 PPM/CM .333  
 SR 4426.59

D1 1.000000  
 PD 2.90  
 RGA  
 RD 0.0  
 PW 0.0  
 DE 77.50  
 NS 24  
 DS 2

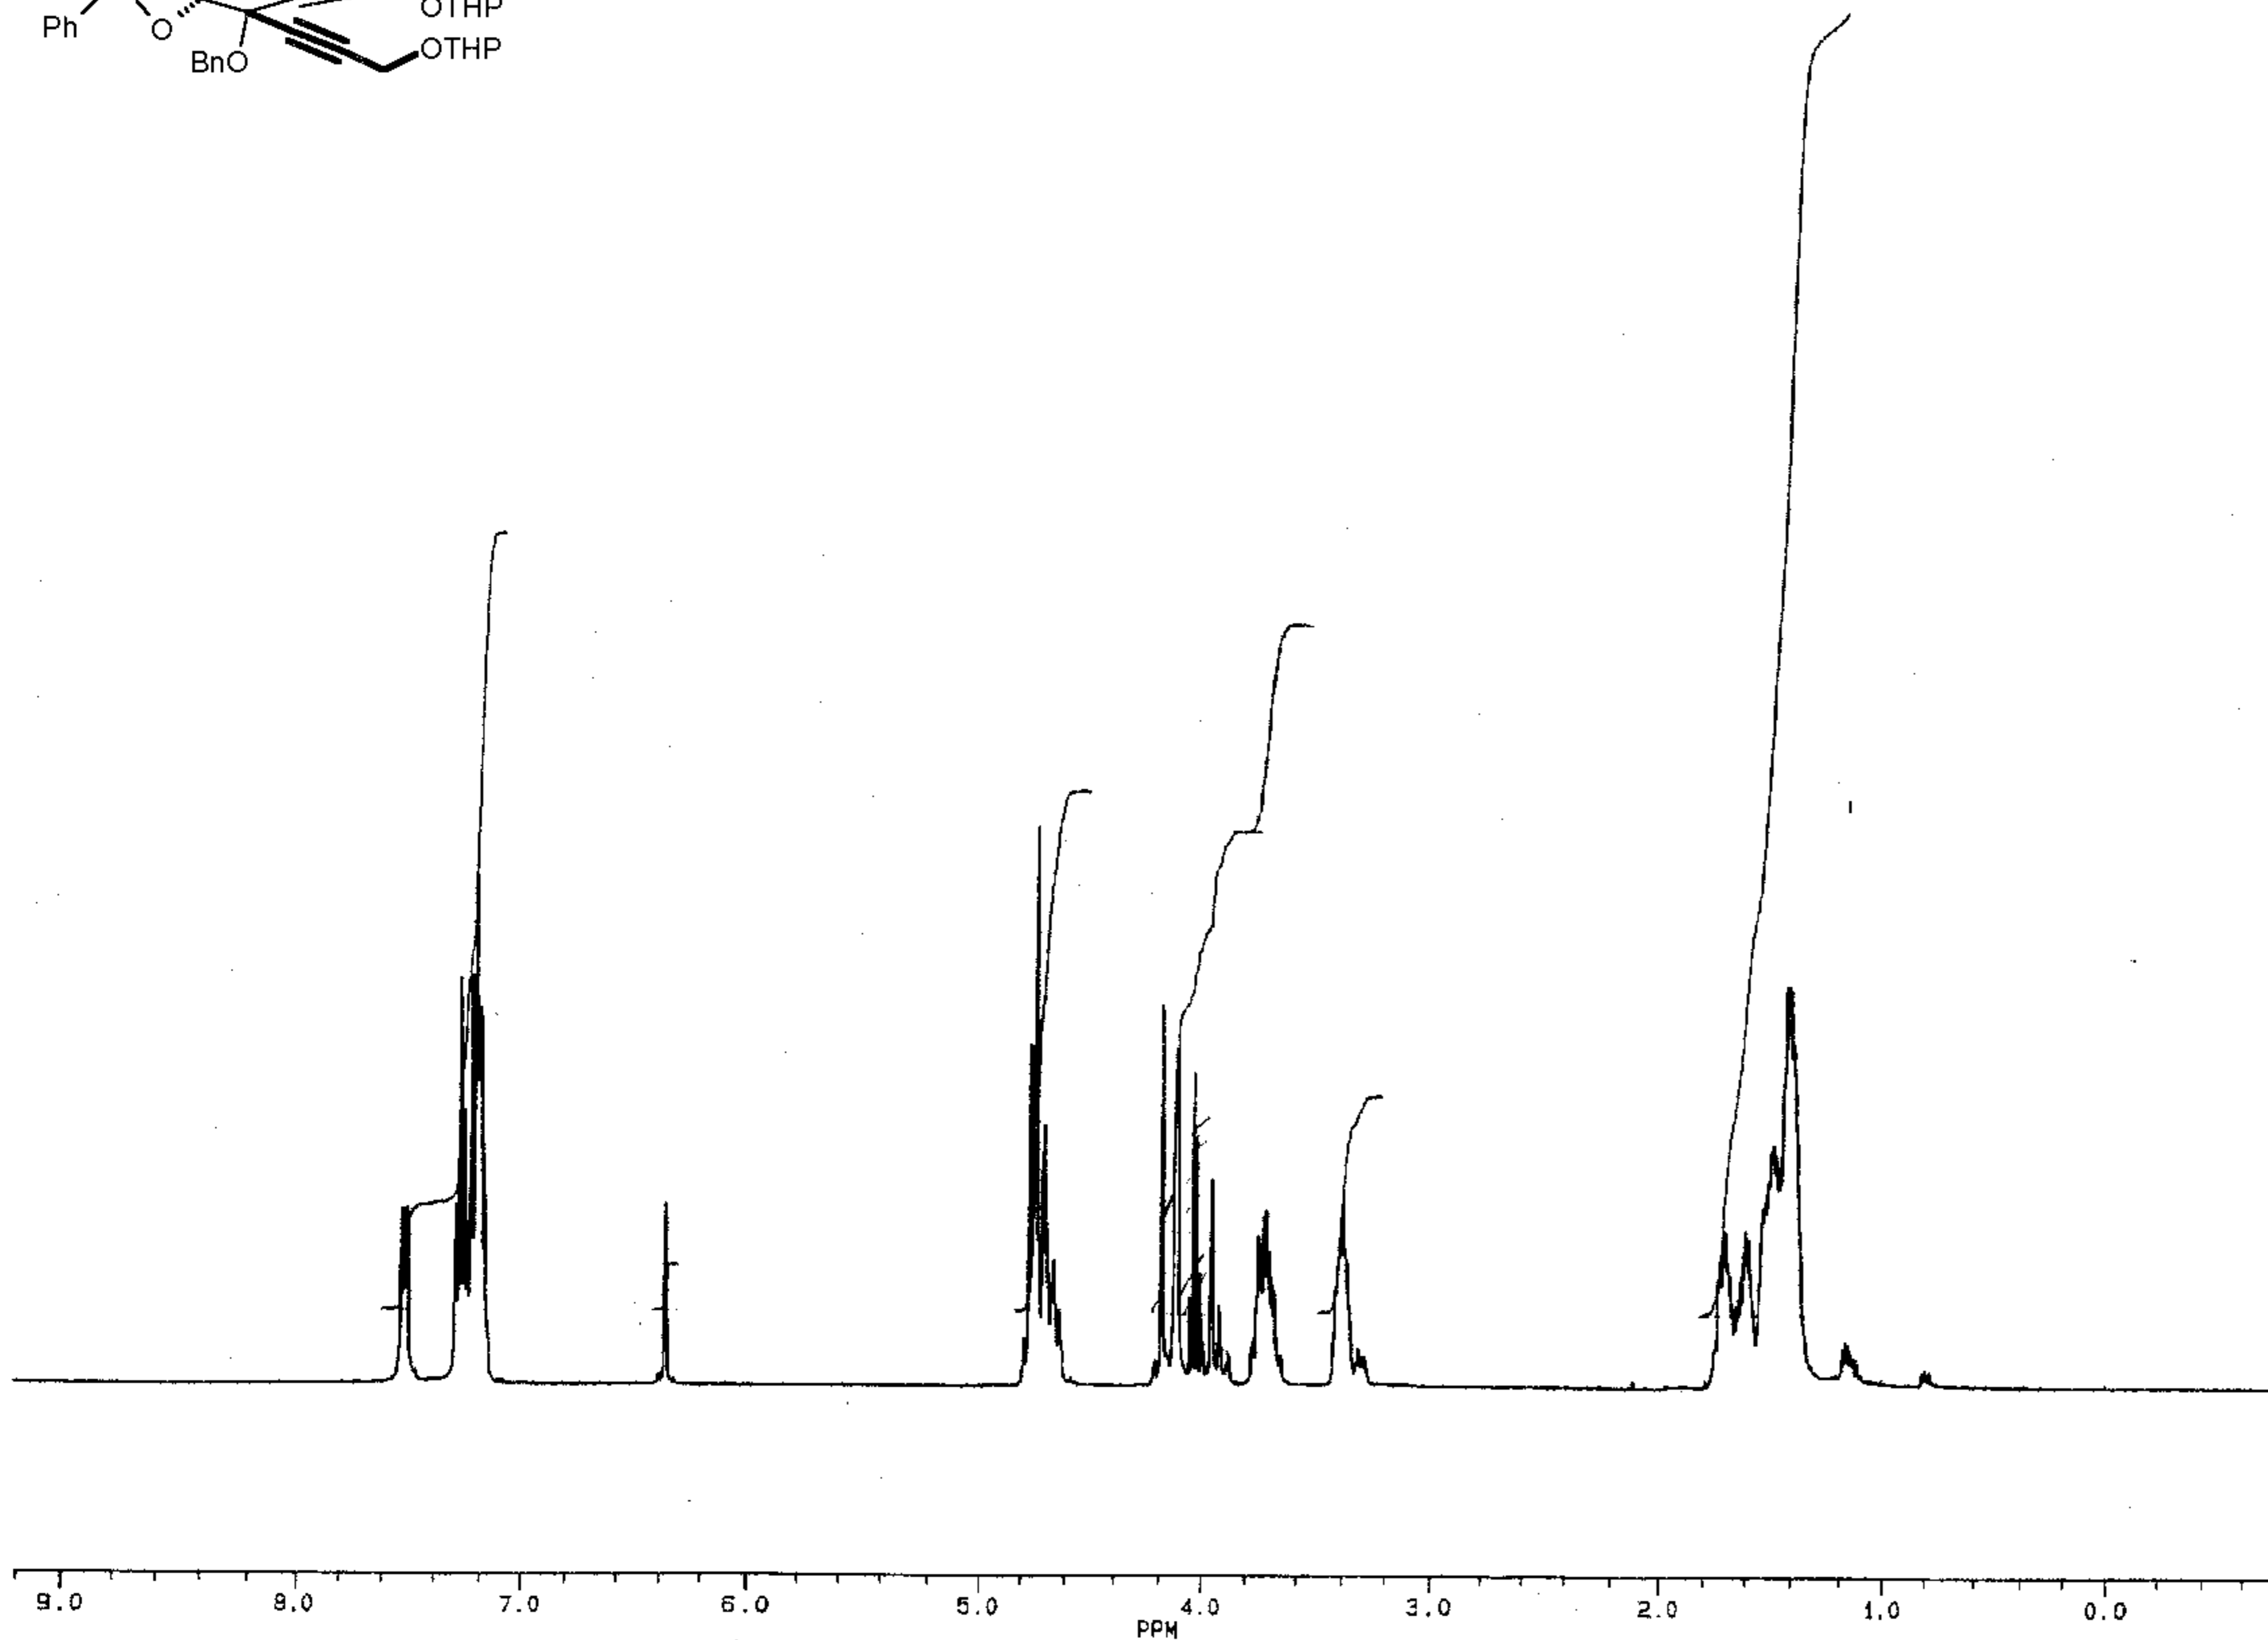

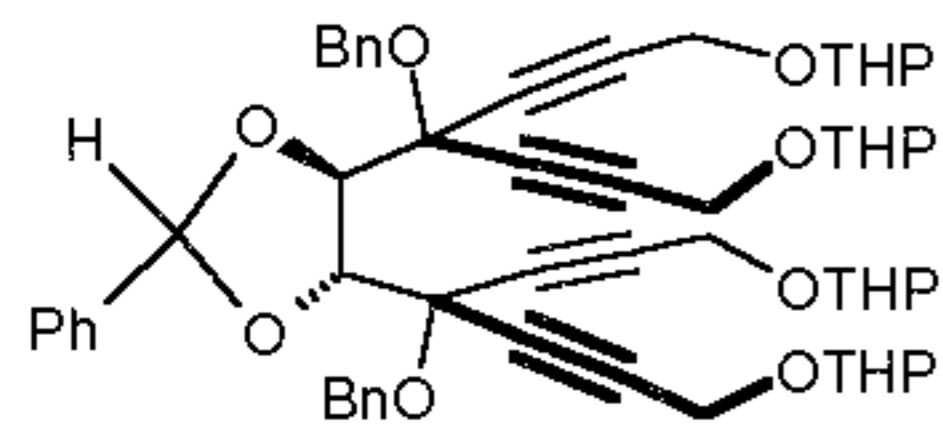

~~BAUER~~

JU212S.113  
 AU PROG:  
 X23.AU  
 DATE 23-6-96  
 TIME 10: 29

SA.NA KOB43749  
 SOLVENT CDC13  
 SF 100.614  
 SY 74.0  
 O1 4125.800  
 SI 65536  
 TD 65536  
 SW 25000.000  
 HZ/PT .763

PW 0.0  
 RD 0.0  
 AQ 1.311  
 RG 800  
 NS 96  
 TE 297

FW 31300  
 O2 6908.850  
 DP 17H CPD

LB 1.000  
 GB .100  
 CX 30.00  
 CY 12.00  
 F1 220.001P  
 F2 -9.994P  
 HZ/CM 771.357  
 PPM/CM 7.667  
 SR -6122.00

D1 2.0000000  
 P9 99.00  
 S1 17H  
 O5 .0010000  
 S2 17H  
 P0 2.50  
 RGA  
 RD 0.0  
 PW 0.0  
 DE 27.50  
 NS 96  
 OS 2

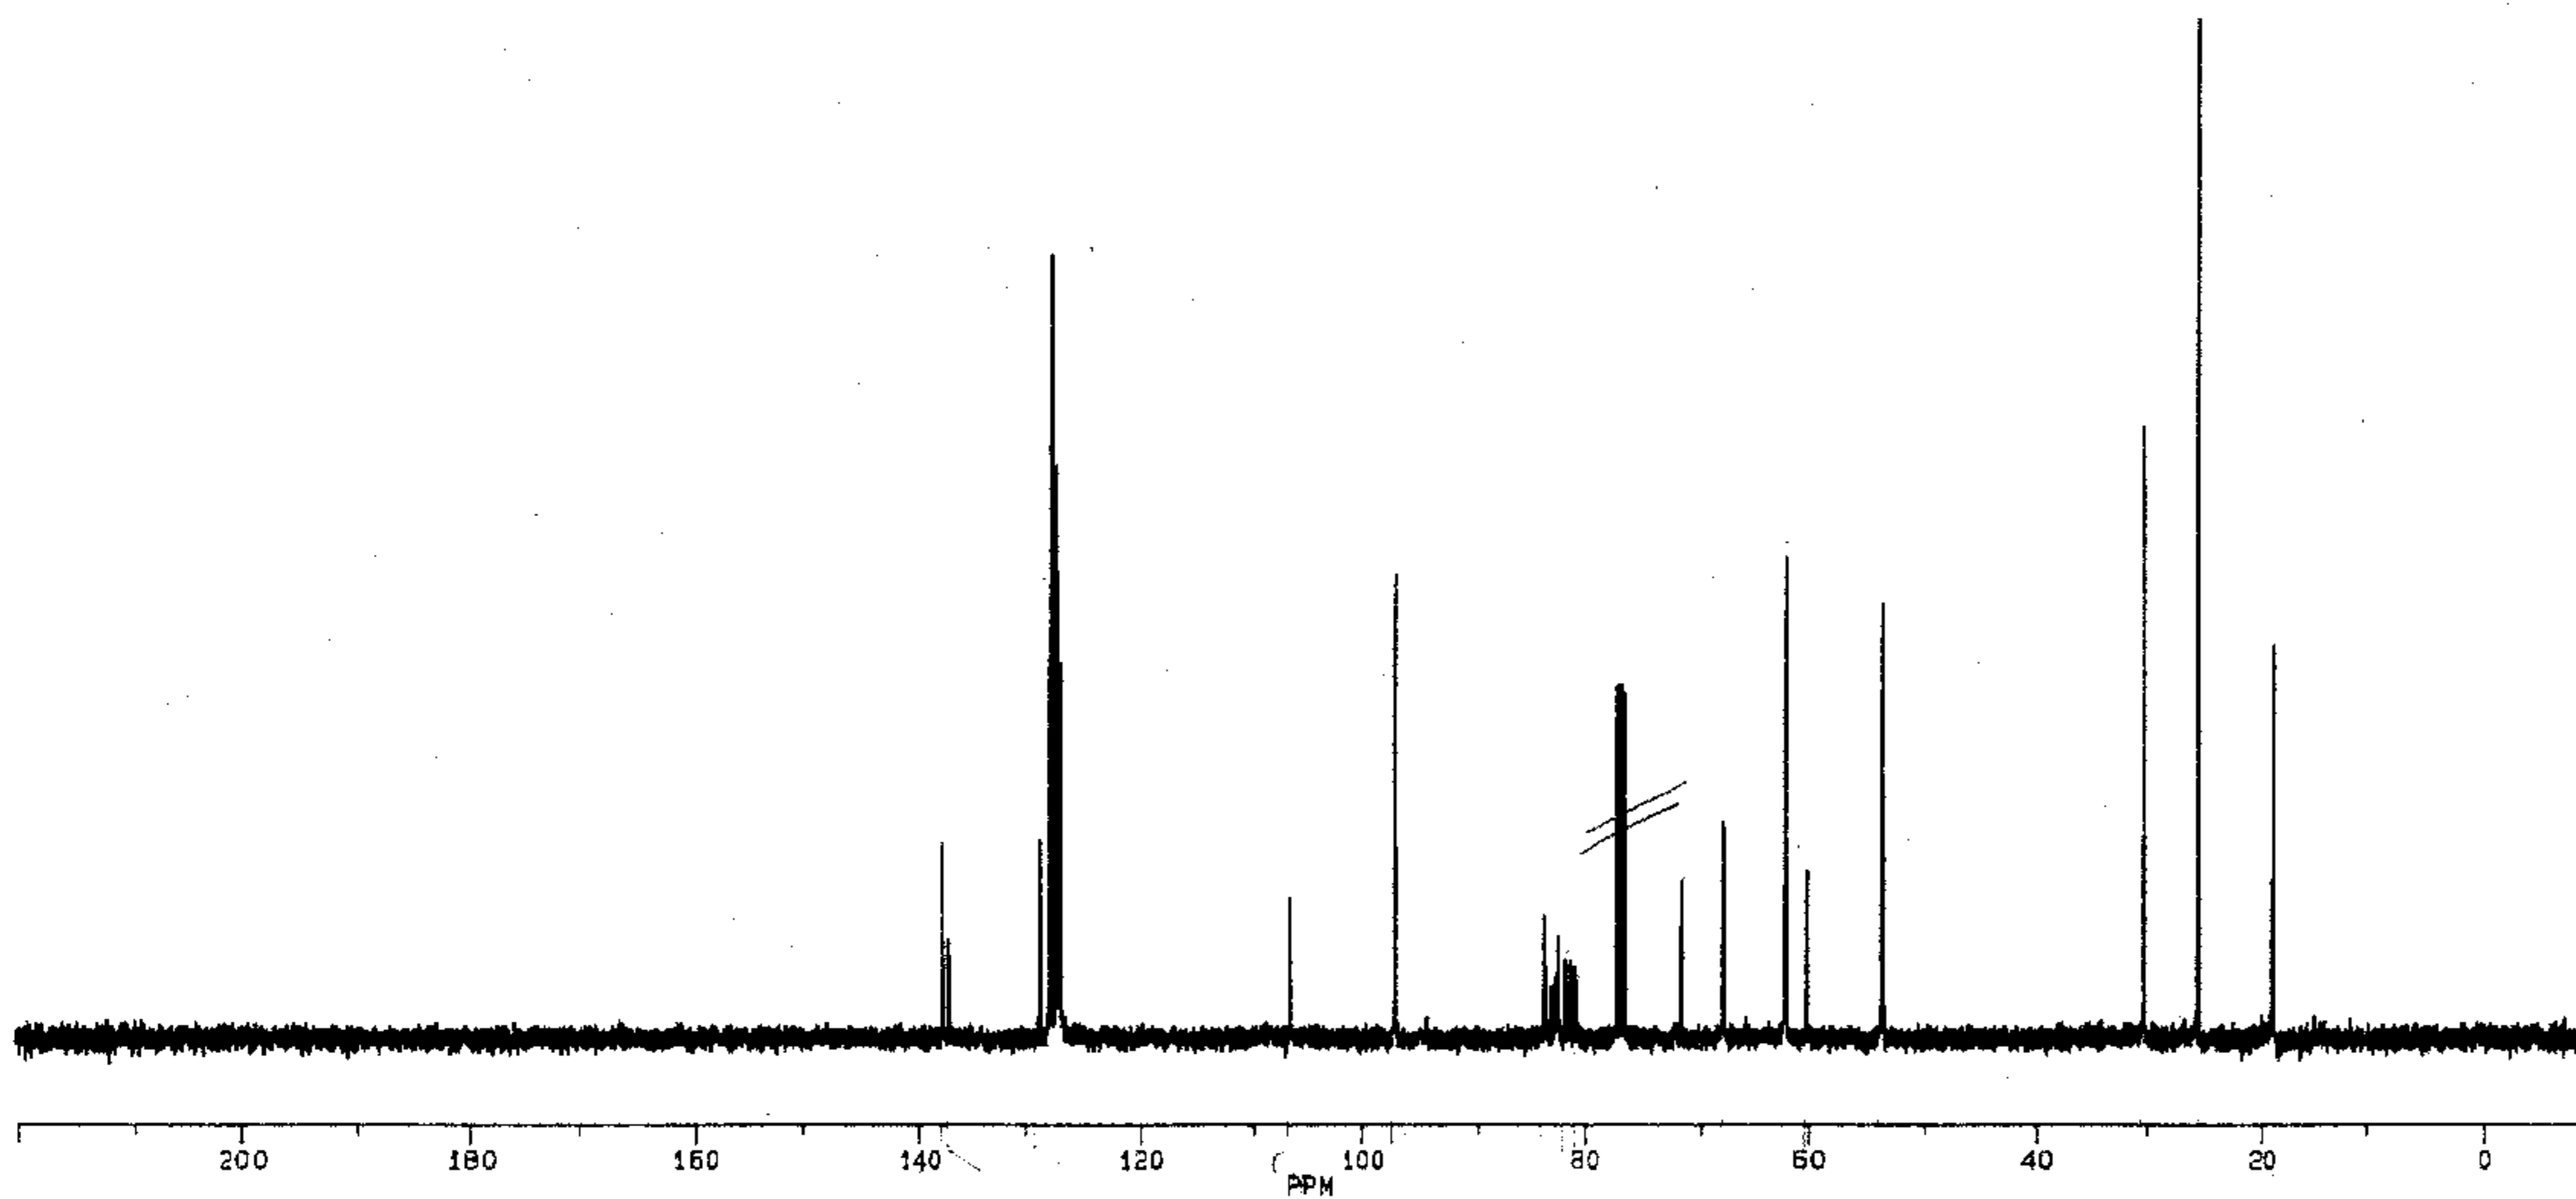

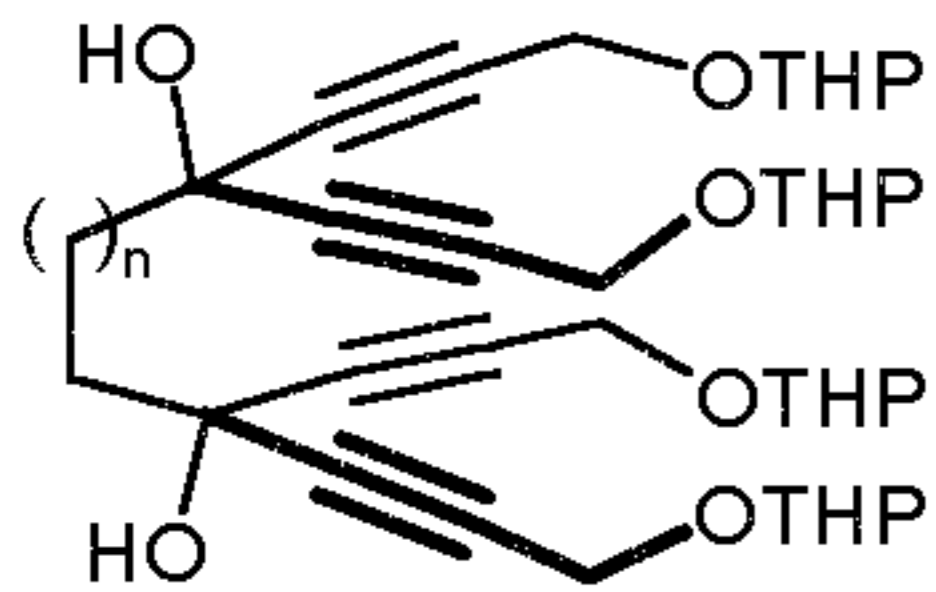

n=3

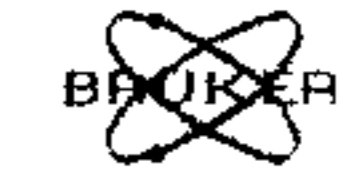

AP301S.114  
 AU PROG:  
 X00.AU  
 DATE 1-5-97  
 TIME 12:53  
  
 SA.NA K0U46706  
 SOLVENT CDCl3  
 SF 400.134  
 SY 133.0  
 C1 6908.850  
 SI 32758  
 TD 32758  
 SW 8064.516  
 HZ/PT .492  
  
 PW 0.0  
 RD 0.0  
 AQ 2.032  
 RG 1  
 NS 24  
 TE 297  
  
 FW 10100  
 O2 0.0  
 DP 63L P0  
  
 LB 0.0  
 GB 0.0  
 CX 30.00  
 CY 0.0  
 F1 9.200P  
 F2 -.800P  
 HZ/CM 133.375  
 PPM/CM .333  
 SR 4339.47  
  
 D1 1.000000  
 P0 4.10  
 R6A  
 RD 0.0  
 PW 0.0  
 DE 77.50  
 NS 24  
 DS 2

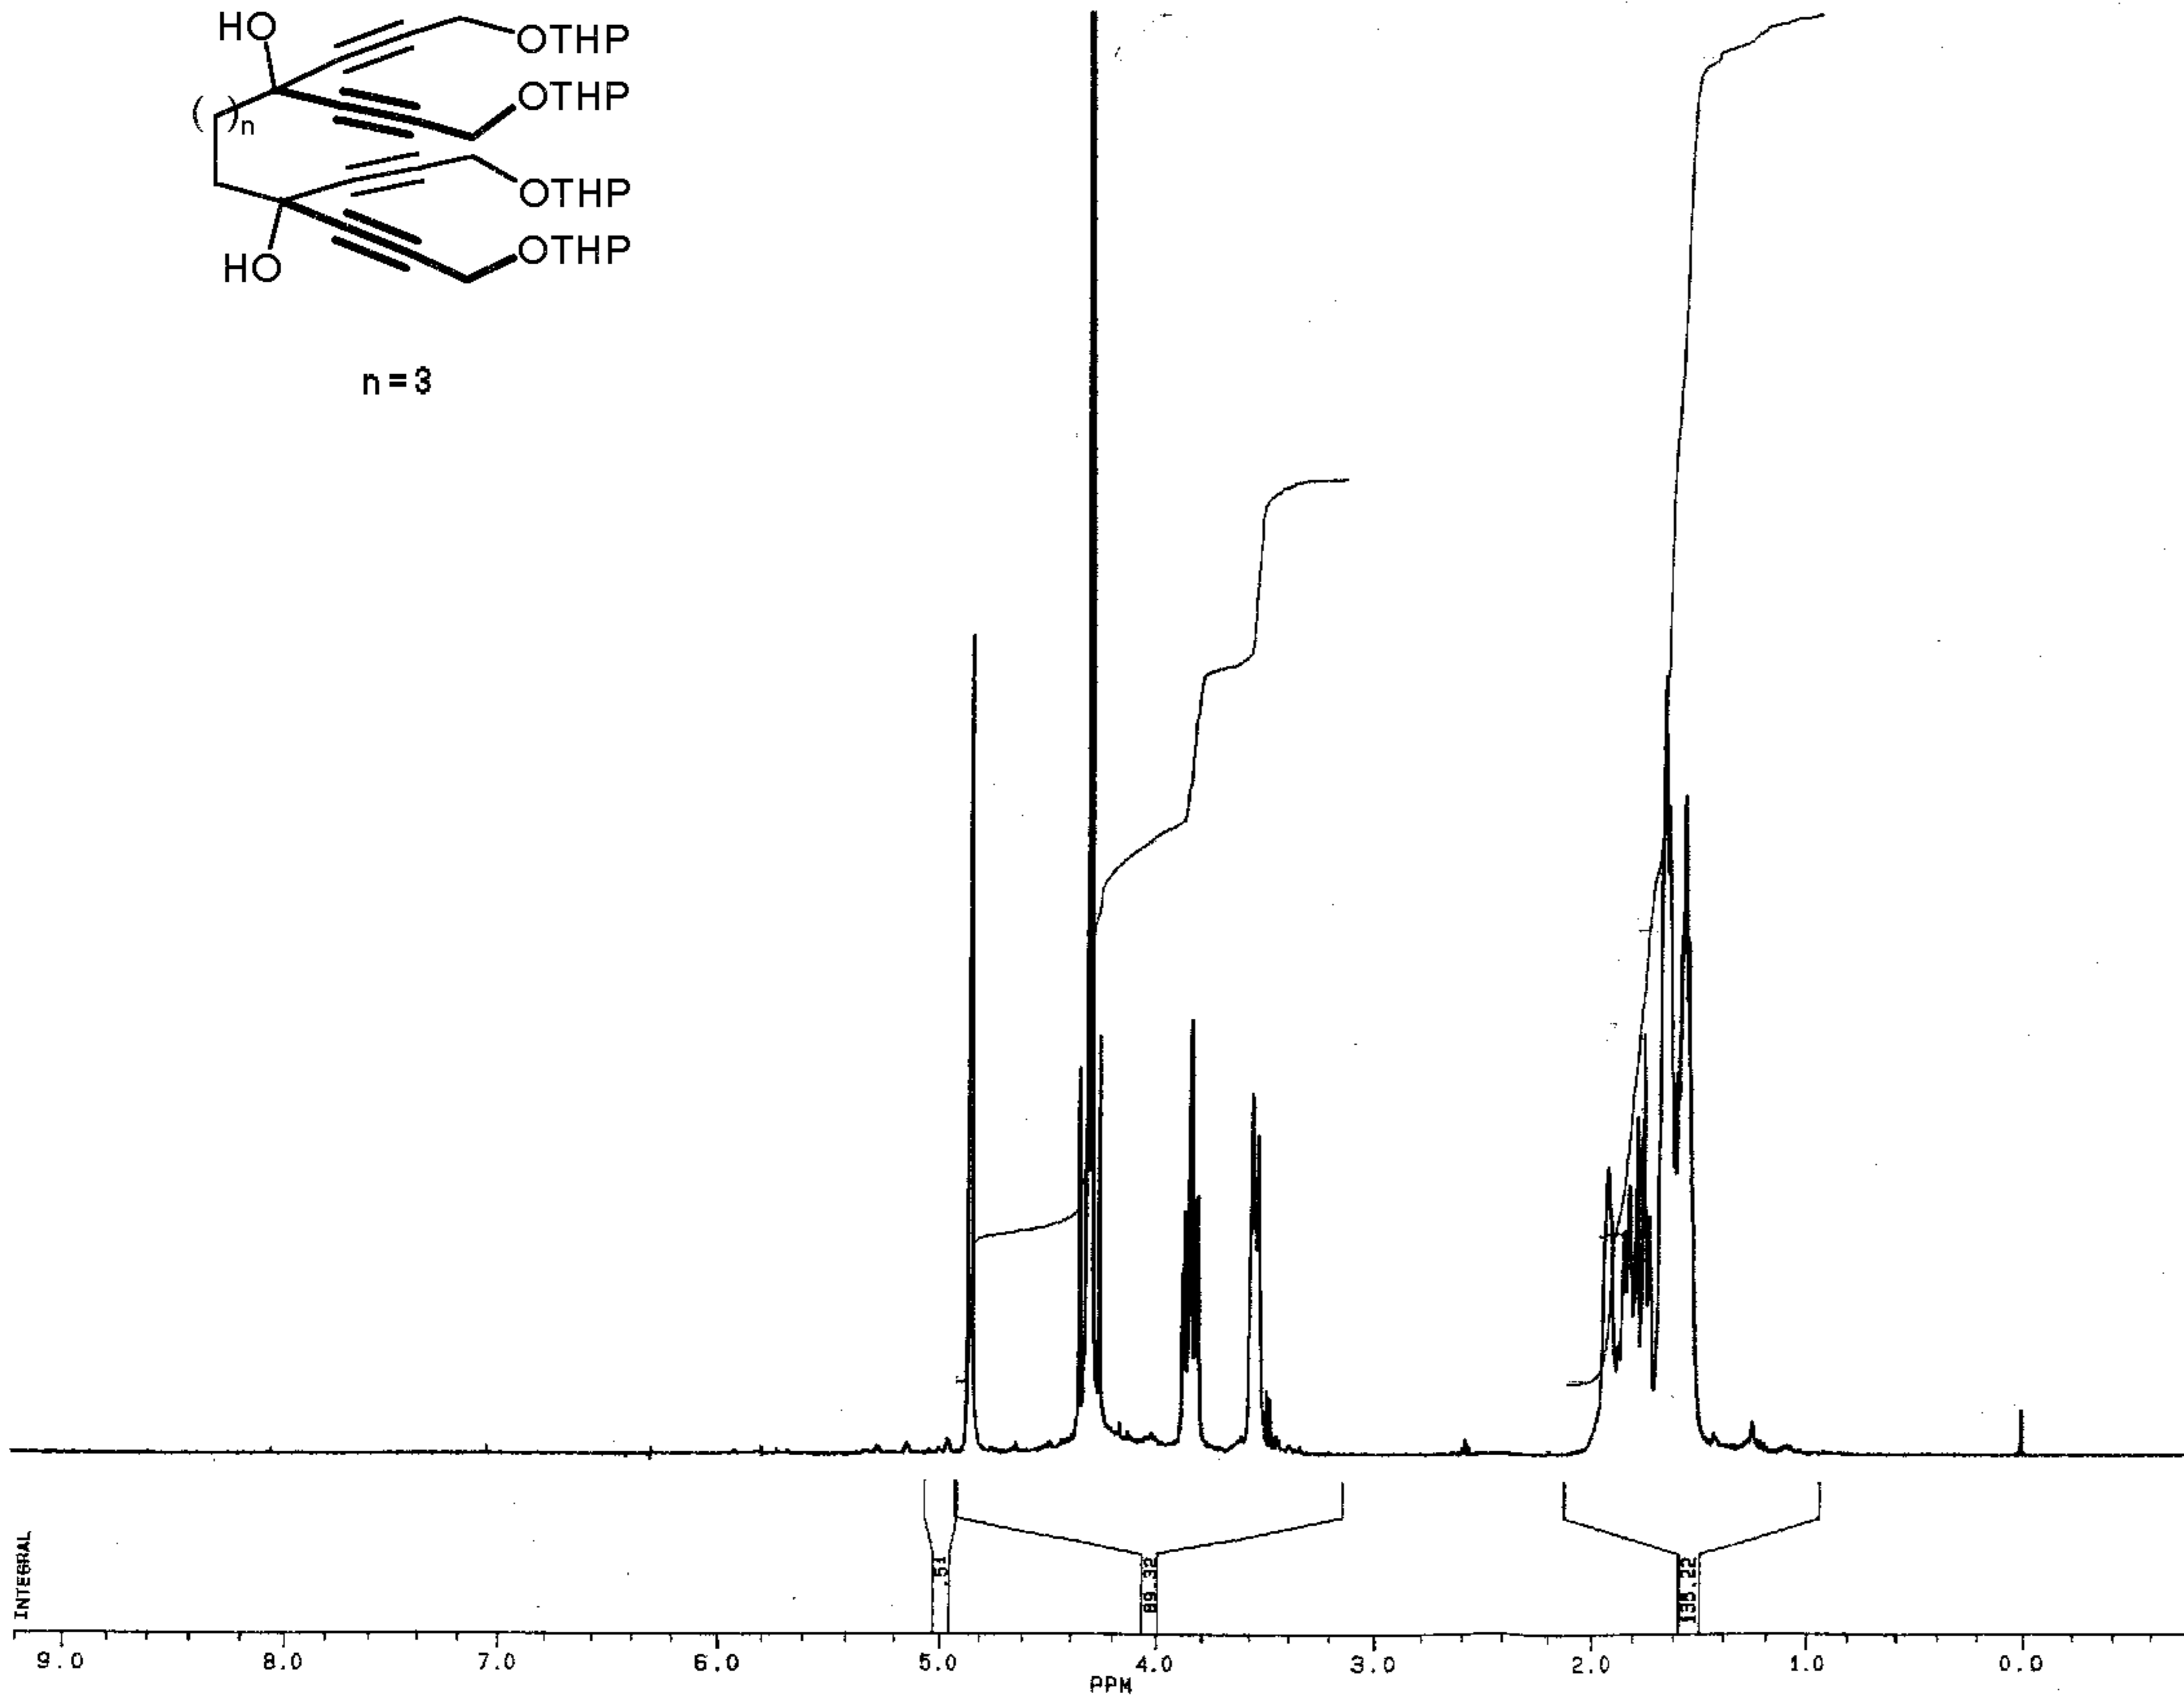

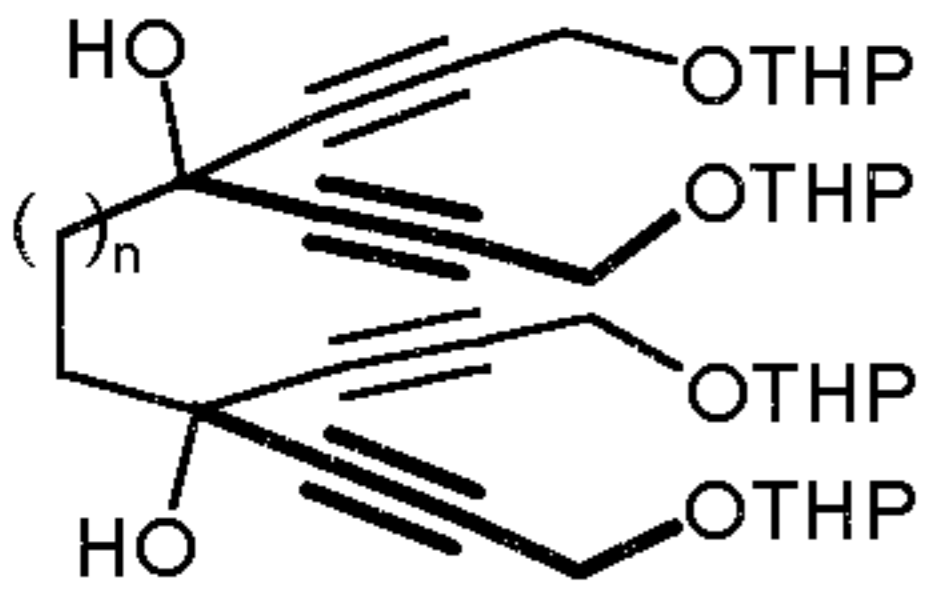

n=3

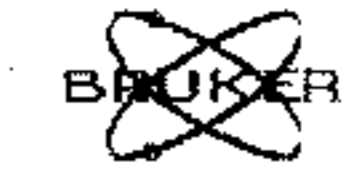

AP302S.114  
 AU PROG:  
 X23 AU  
 DATE 1-5-97  
 TIME 13:01

SA.NA KOU46706  
 SOLVENT CDCl3  
 SF 100.614  
 SY 74.0  
 O1 4125.800  
 SI 65536  
 TD 65536  
 SW 25000.000  
 HZ/PT .763

PW 0.0  
 RD 0.0  
 AQ 1.311  
 RG 400  
 NS 96  
 TE 297

FW 31300  
 O2 6908.850  
 DP 16H CPD

LB 1.000  
 GB .100  
 CX 30.00  
 CY 12.00  
 F1 220.001P  
 F2 -9.994P  
 HZ/CM 771.357  
 PPM/CM 7.667  
 SR -6122.00

D1 2.0000000  
 P9 102.00  
 S1 16H  
 D5 .0010000  
 S2 16H  
 P0 2.60  
 RGA  
 RD 0.0  
 PW 0.0  
 DE 27.50  
 NS 96  
 DS 2

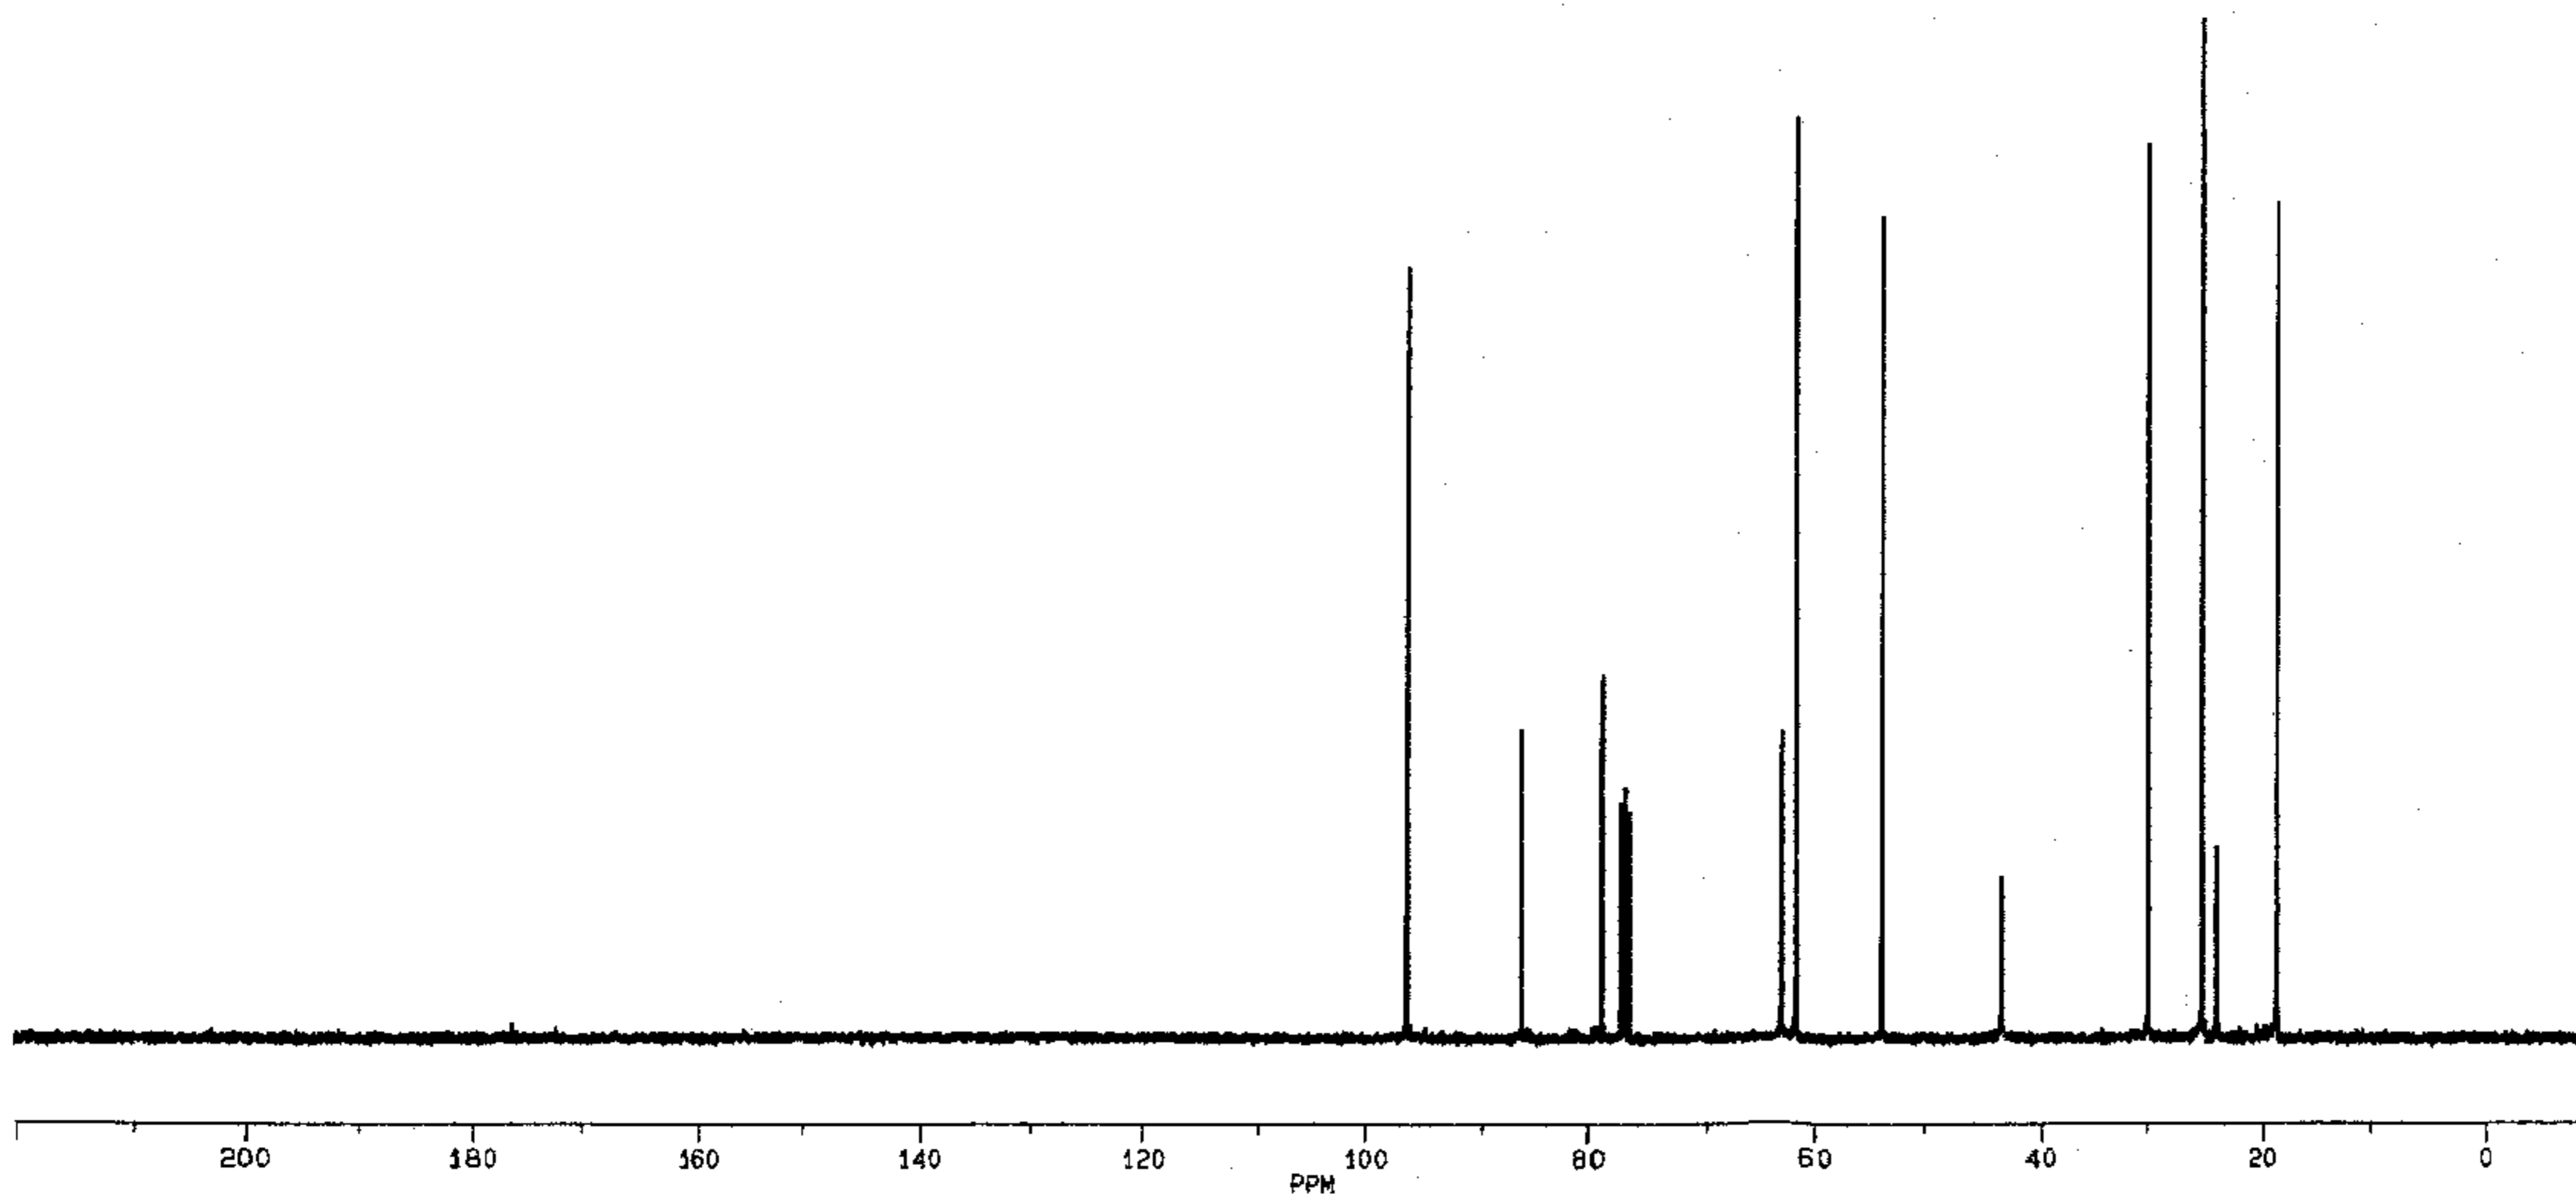

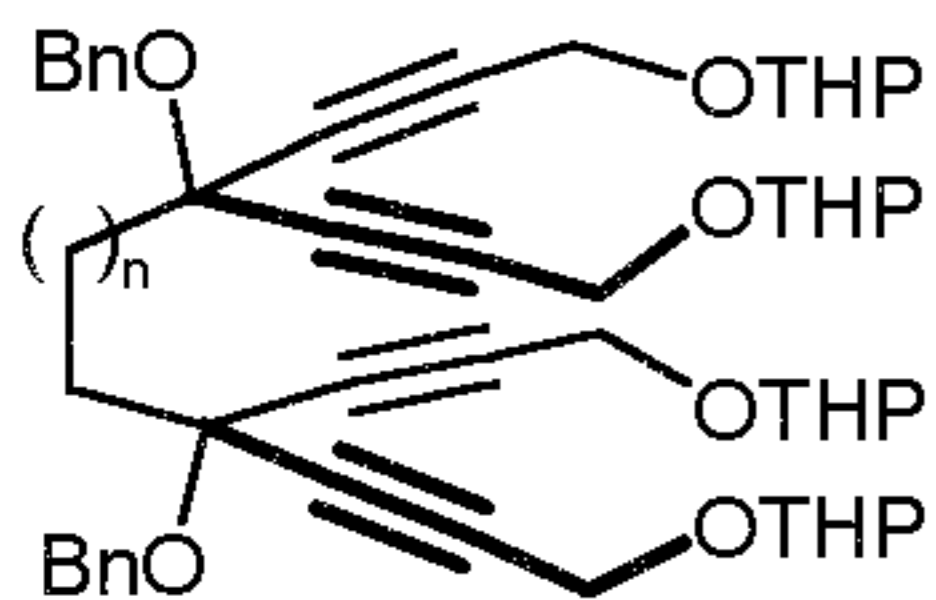

$n=3$

~~BAJIKER~~

JUS01S.116  
 AU PRDG:  
 X00.AU  
 DATE 1-7-97  
 TIME 10:33

SA.NA PIW47393  
 SOLVENT CDC13  
 SF 400.134  
 SY 133.0  
 O1 6908.650  
 SI 32768  
 TD 32768  
 SW 8064.516  
 HZ/PT .492

PN 0.0  
 RD 0.0  
 AQ 2.032  
 RG 10  
 NS 24  
 TE 297

FW 10100  
 O2 0.0  
 DP 63L P0

LB 0.0  
 EB 0.0  
 CX 30.00  
 CY 1E.00  
 F1 9.201P  
 F2 -.798P  
 HZ/CM 135.375  
 PPM/CM .333  
 SR 4394.50

O1 1.000000  
 P0 4.10  
 RGA  
 RD 0.0  
 PW 0.0  
 DE 77.50  
 NS 24  
 DS 2

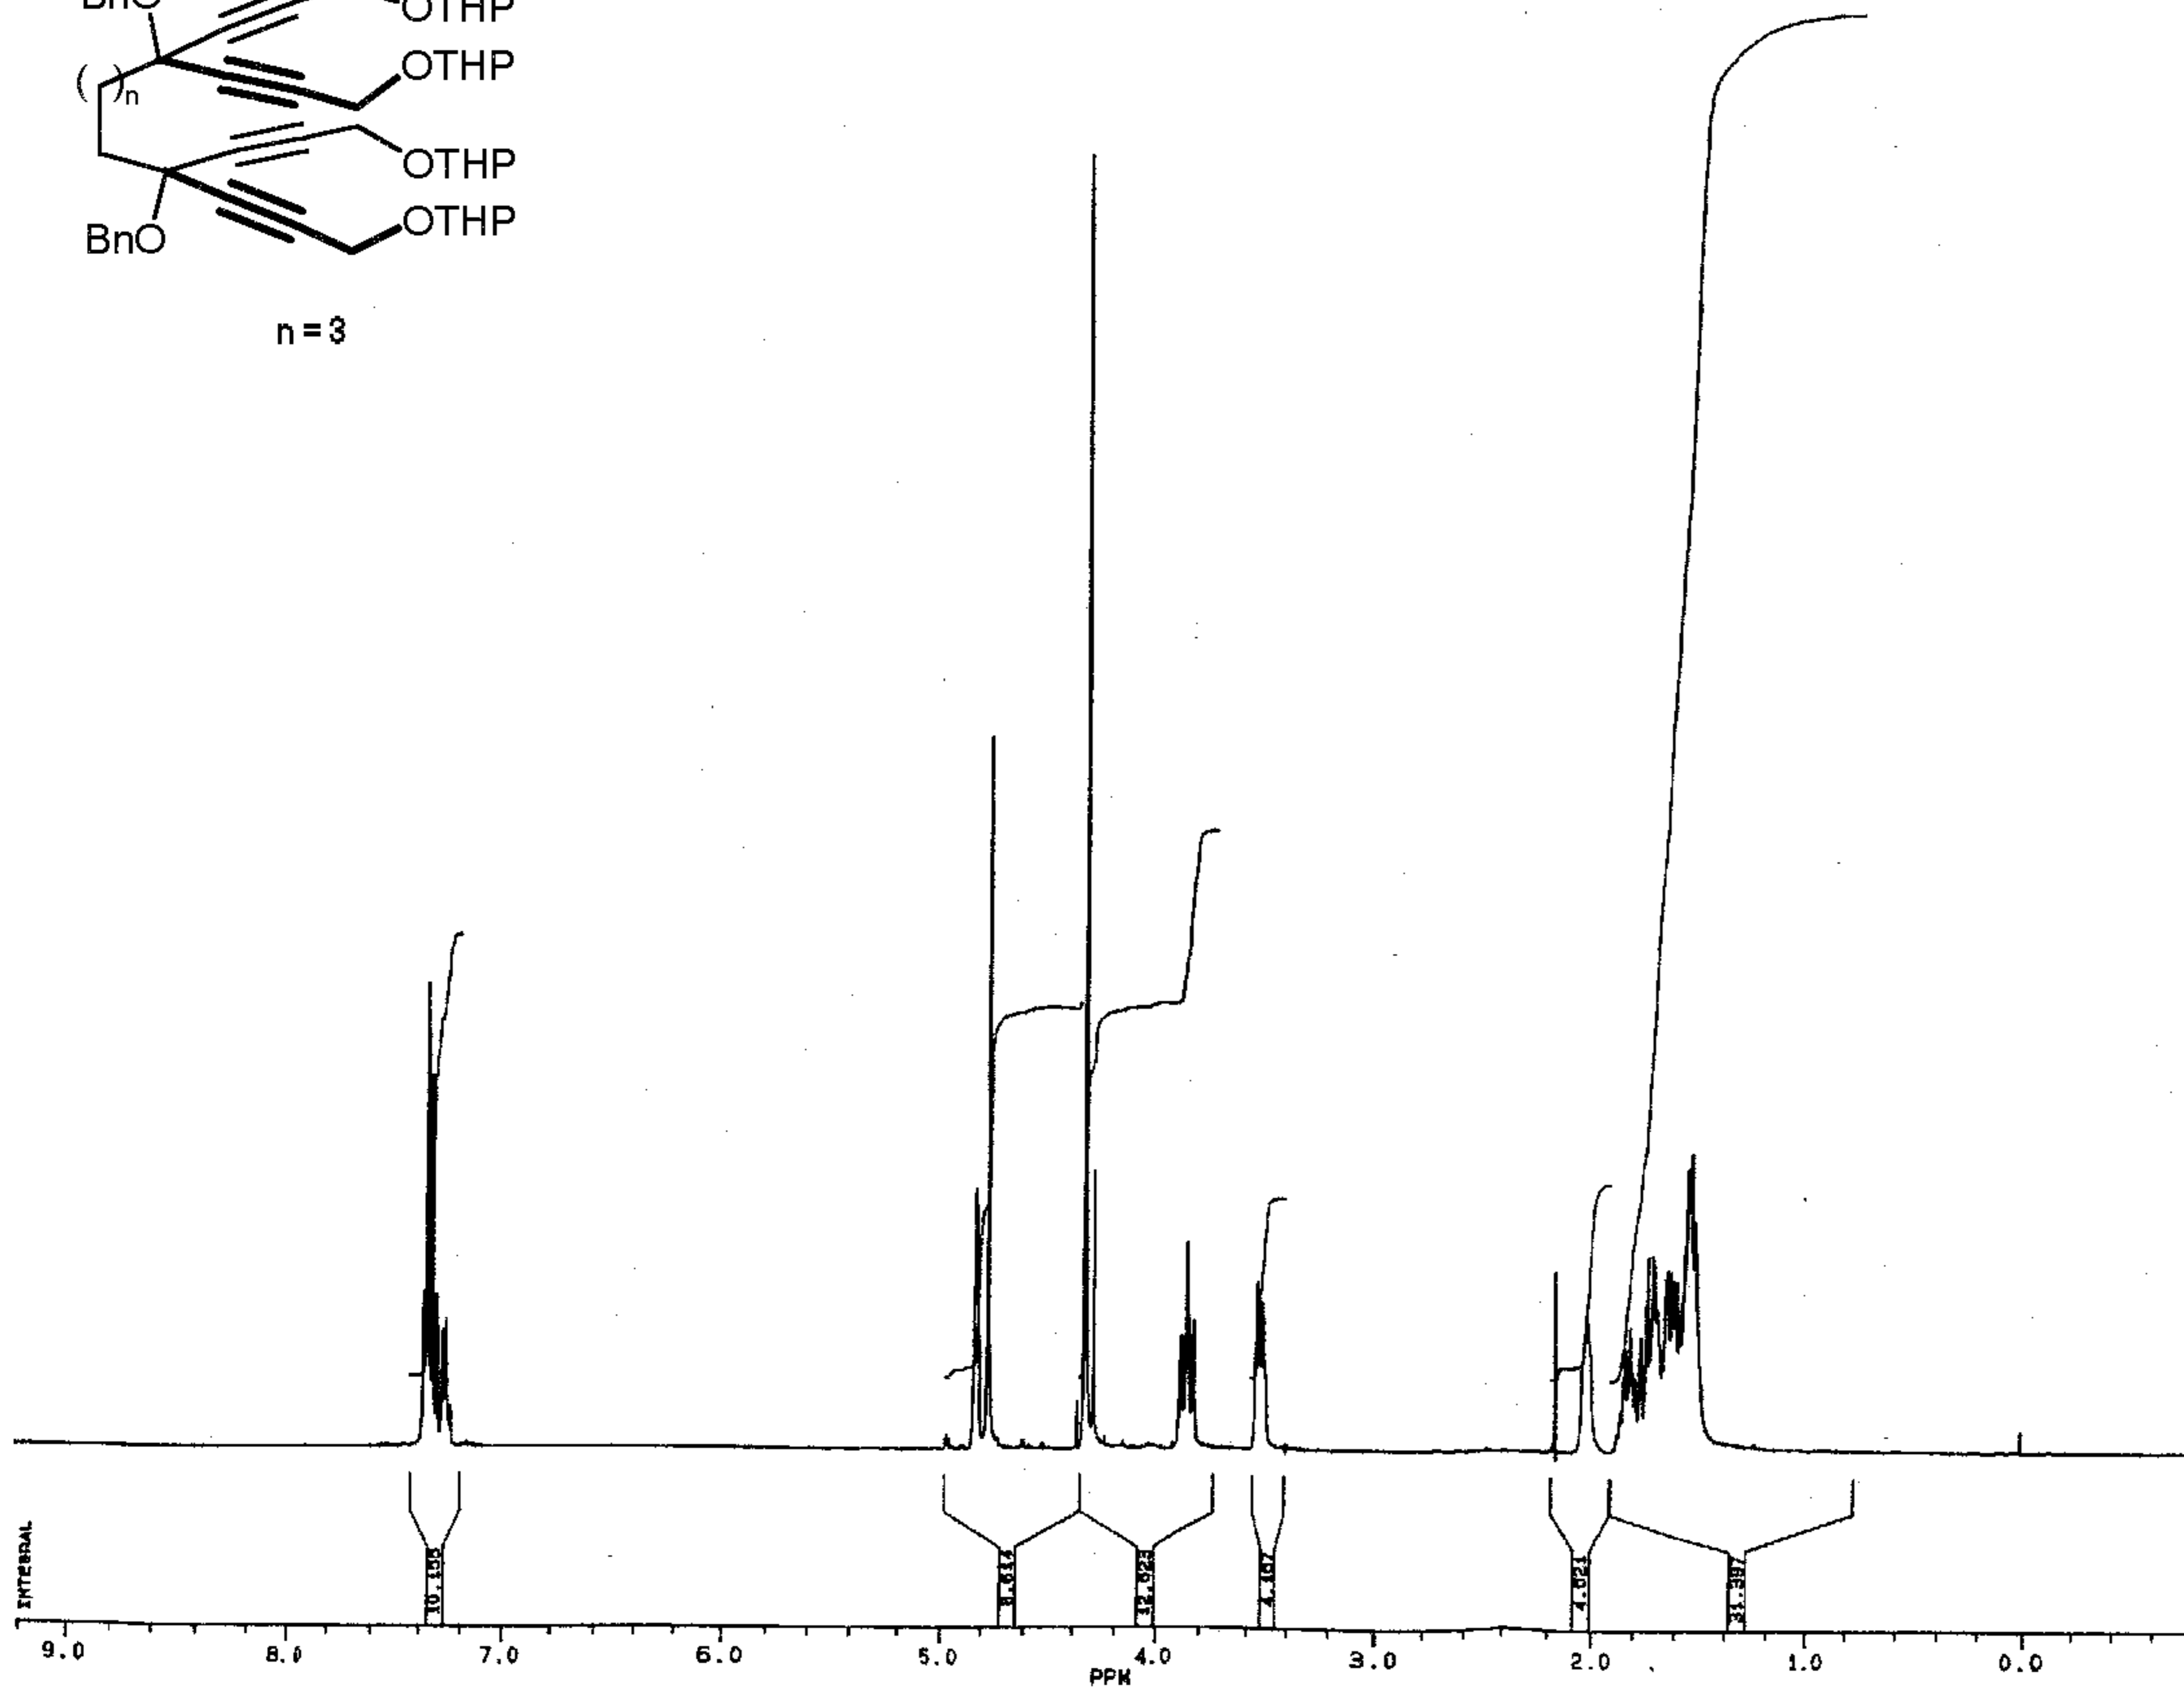

~~BAUKER~~

JUS02S.116  
AU PRDS:  
X29. AU  
DATE 1-7-87  
TIME 10: 42

SA. NA #IW47393  
SOLVENT CDCl3  
SF 100.614  
SY 74.0  
O1 4125.800  
SI 65536  
TD 65536  
SW 25000.000  
HZ/PT .763

PW 0.0  
RD 0.0  
AQ 1.311  
RG 300  
NS 96  
TE 297

FW 31300  
Q2 6906.850  
DP 16H CPD

LB 1.000  
GB .100  
CX 30.00  
CY 12.00  
F1 220.001P  
F2 -9.994P  
HZ/CM 771.357  
PPM/CM 7.667  
SR -6122.00

D1 2.0000000  
P9 102.00  
S1 15H  
D5 .0010000  
S2 15H  
P0 2.60  
ACA  
AD 0.0  
PW 0.0  
DE 27.50  
NS 96  
DS 2

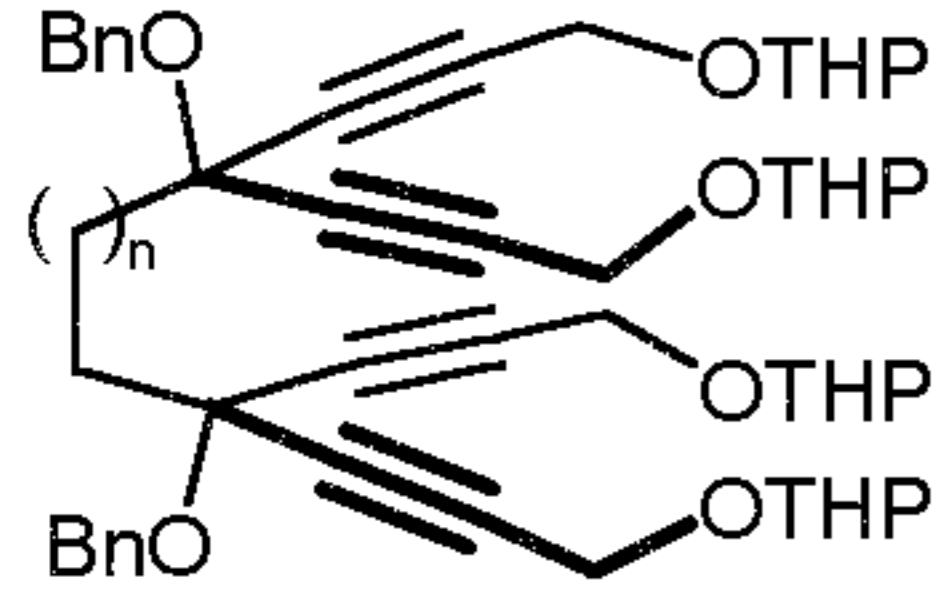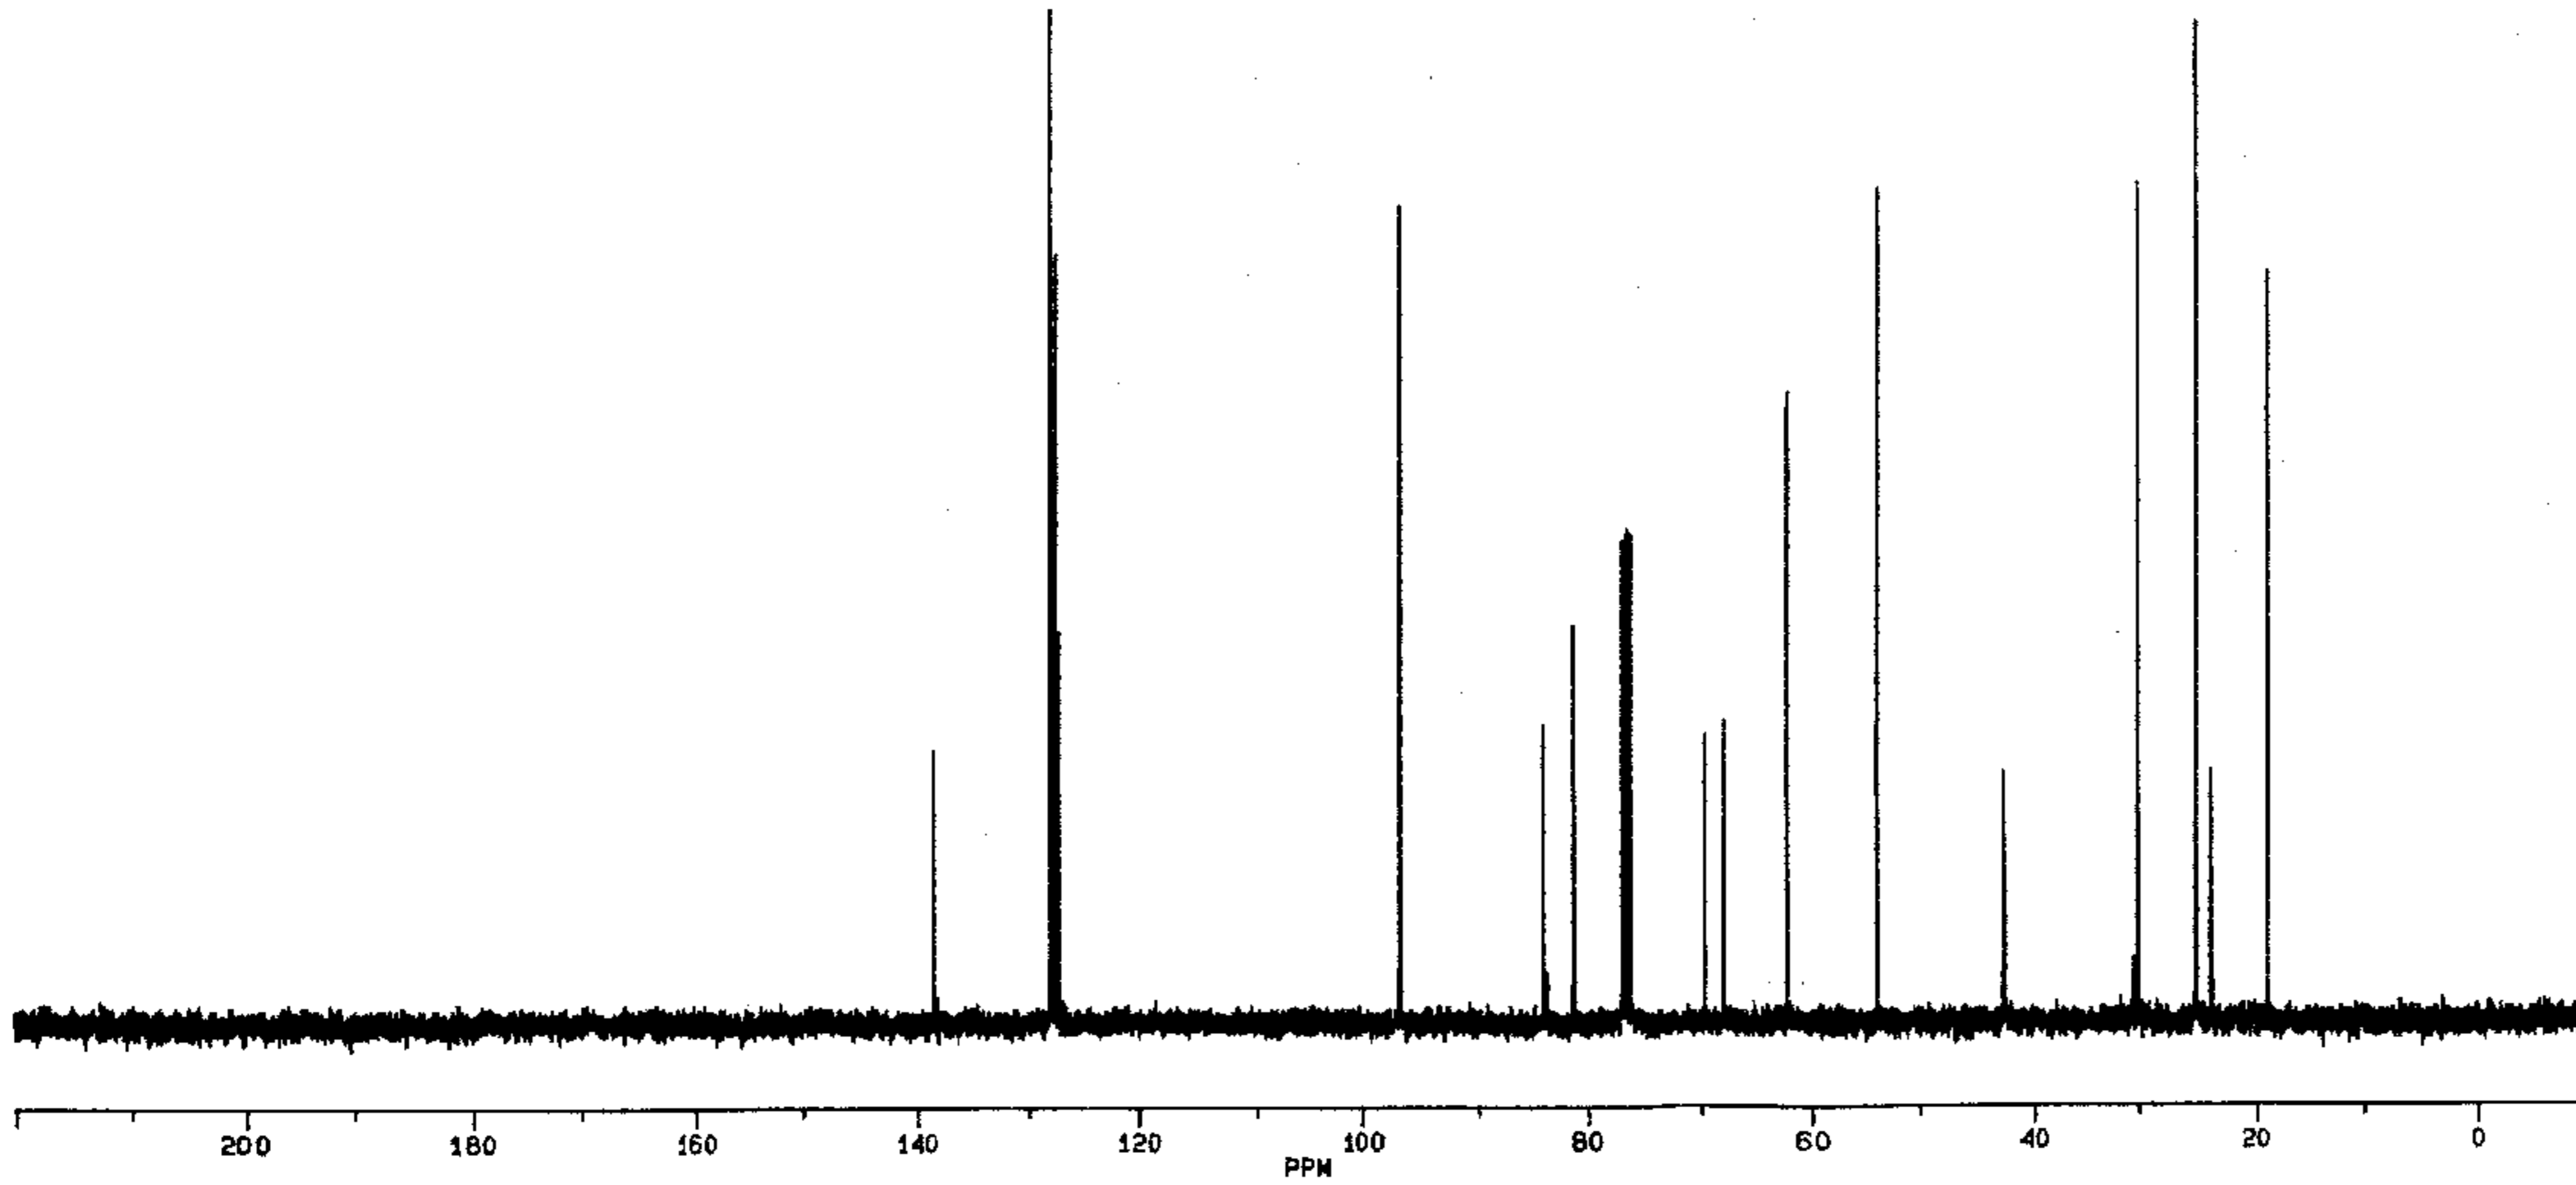

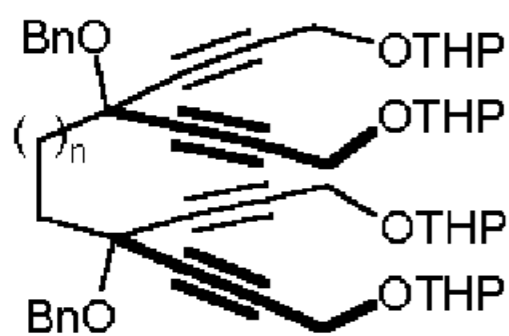

$n = 2$

~~BRUKER~~

MI271S.112  
 AU PROG:  
 X00.AU  
 DATE 28-5-97  
 TIME 3: 23

SA.NA PIW43977  
 SOLVENT CDC13  
 SF 400.134  
 SY 133.0  
 O1 6908.850  
 SI 32768  
 TD 32768  
 SW 8064.516  
 HZ/PT .492

PW 0.0  
 RD 0.0  
 AQ 2.032  
 RG 20  
 NS 24  
 TE 297

FW 10100  
 O2 0.0  
 DP 63L PC

LB 0.0  
 GB 0.0  
 CX 30.00  
 CY 18.00  
 F1 8.201P  
 F2 -.798P  
 HZ/CM 133.375  
 PPM/CM .333  
 SR 4394.60

D1 1.0000000  
 PC 4.10  
 RGA  
 RD 0.0  
 PW 0.0  
 DE 77.50  
 NS 24  
 DS 2

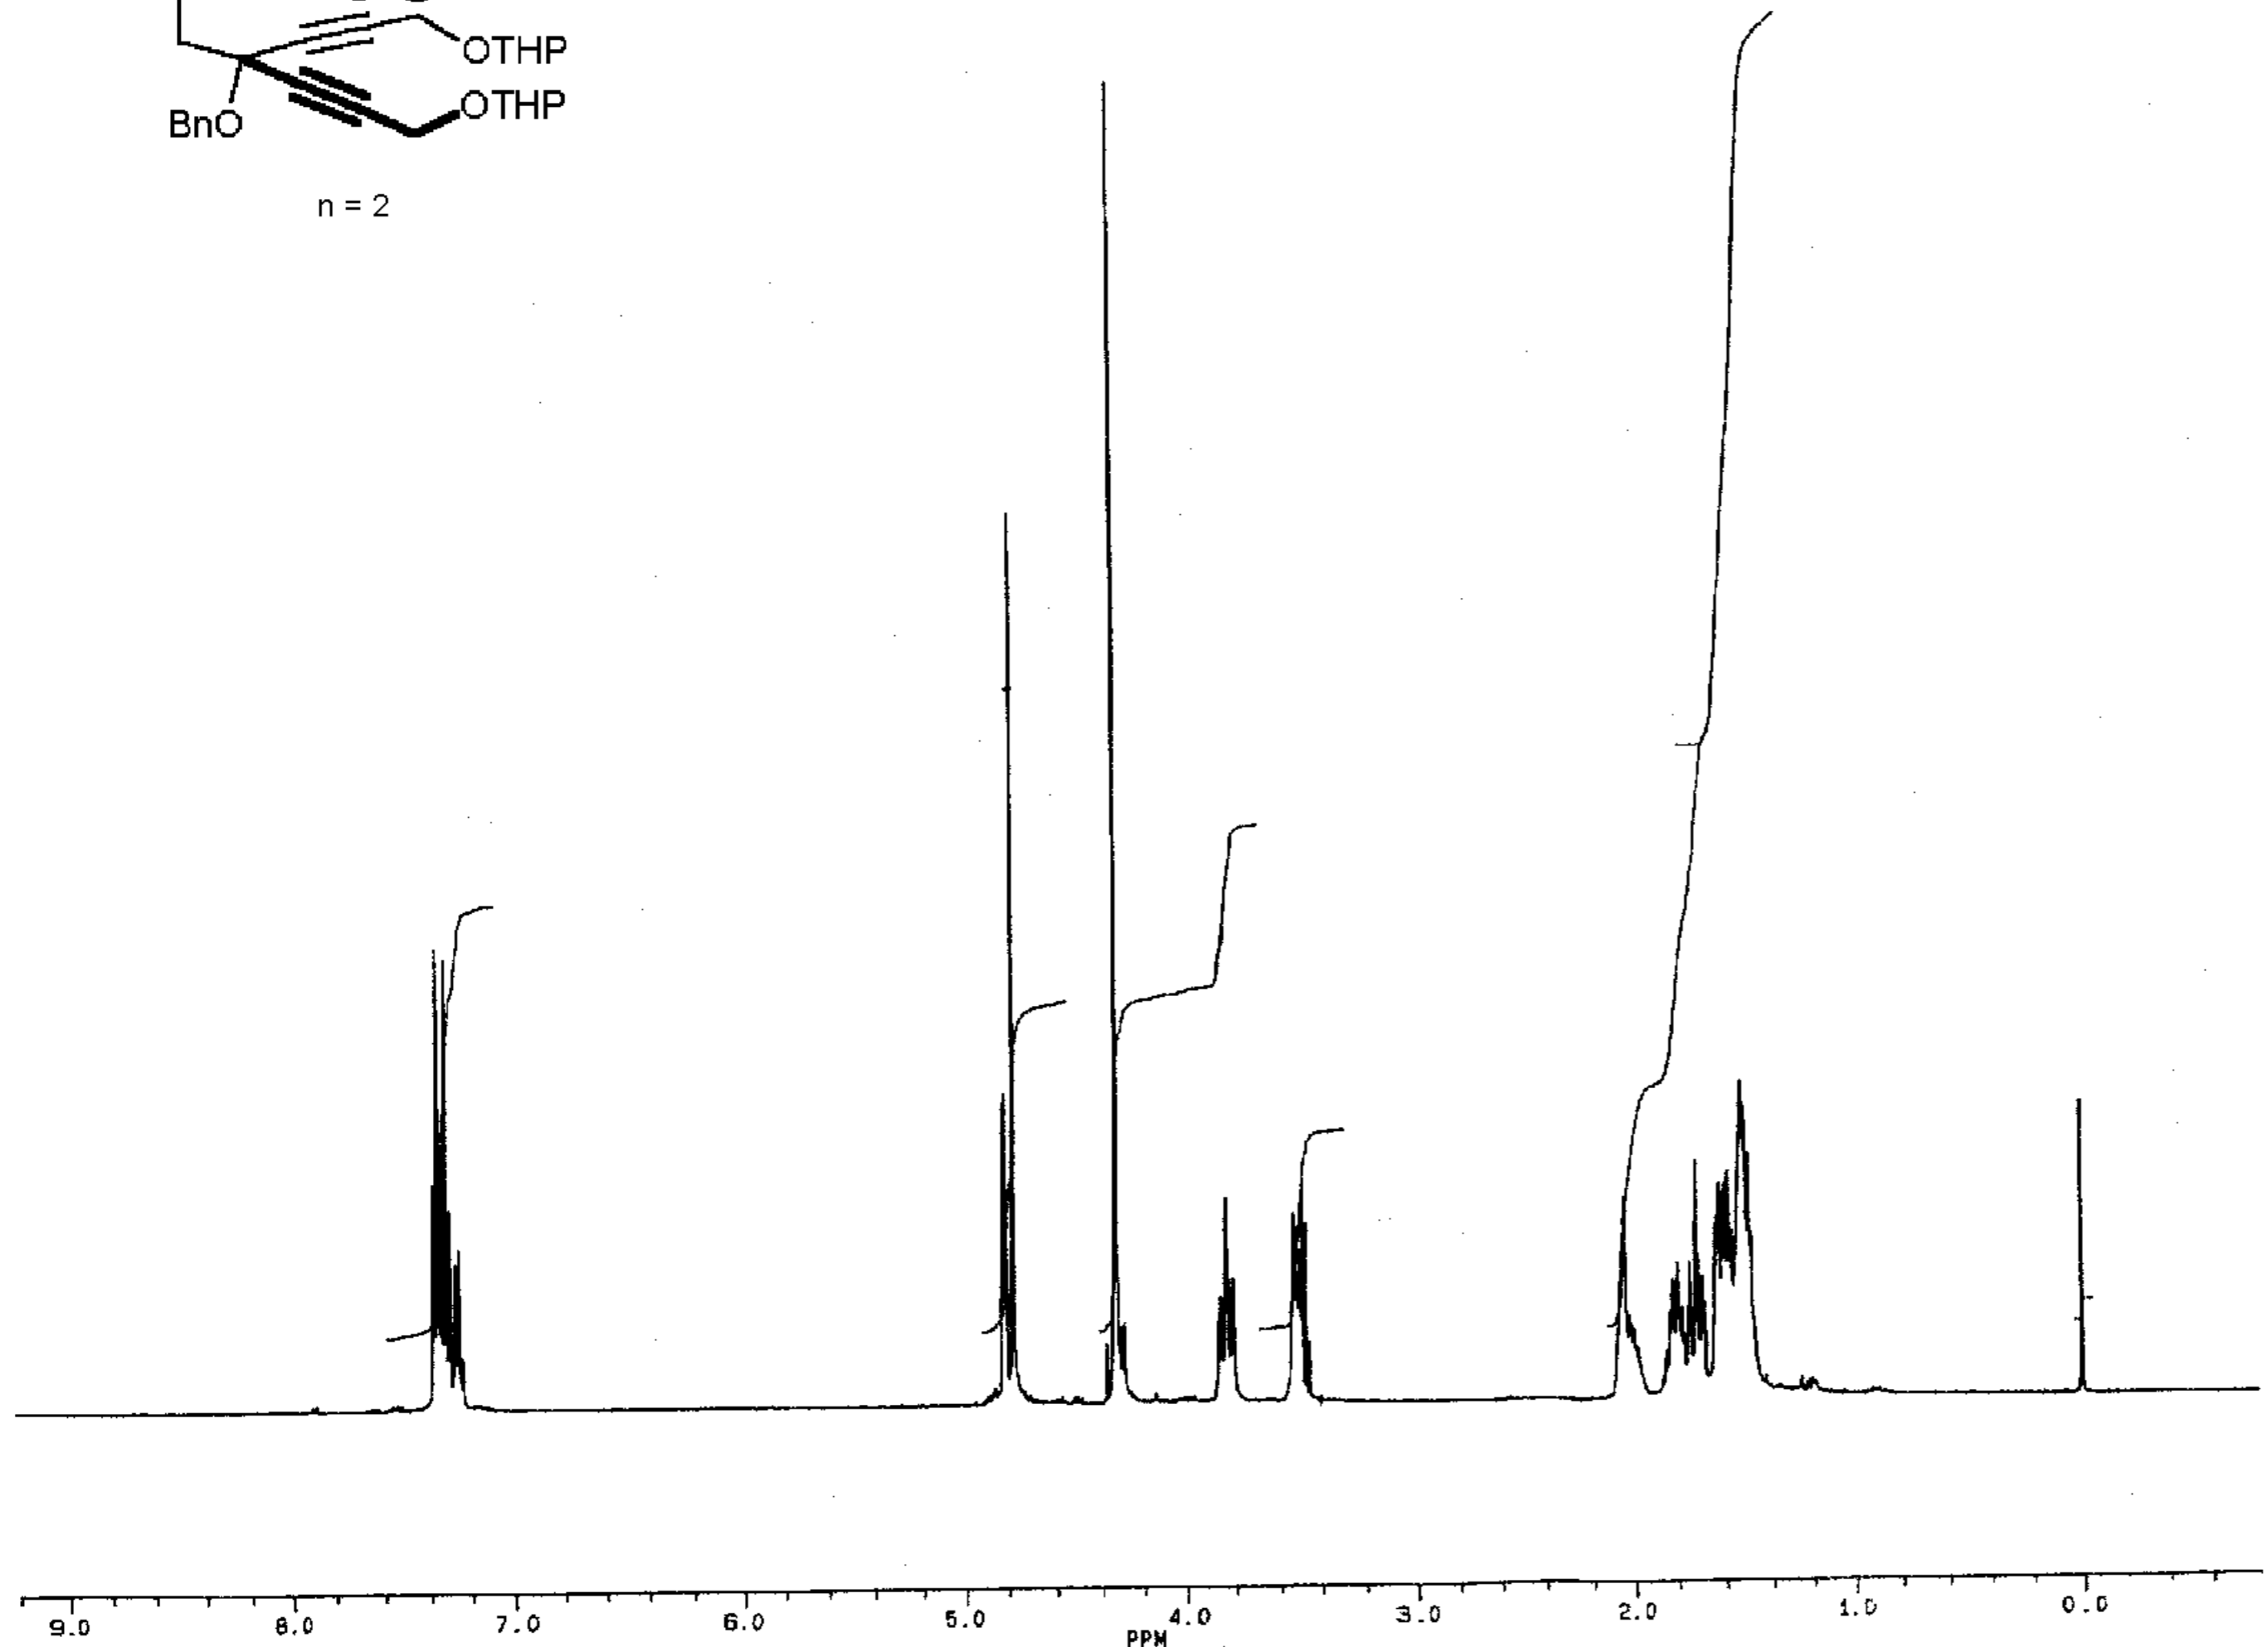

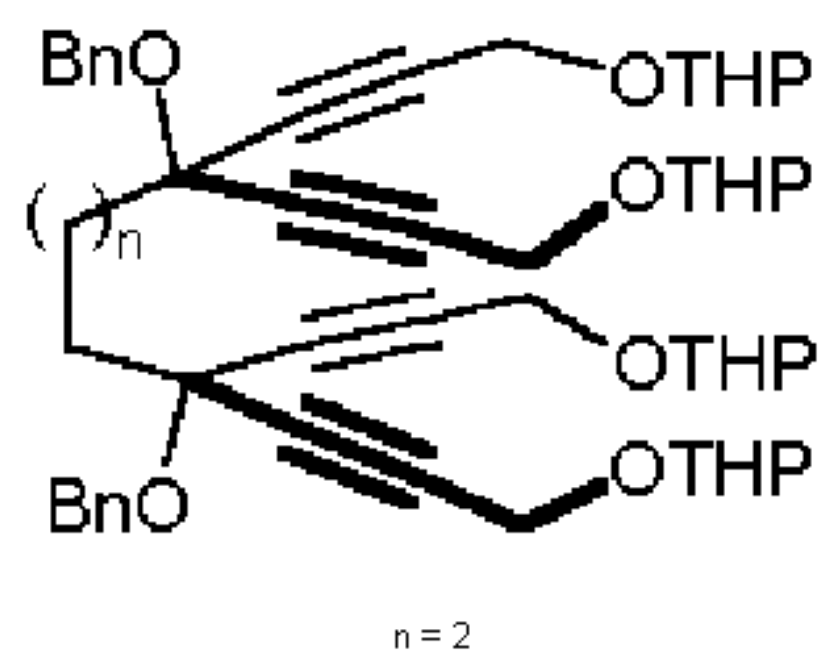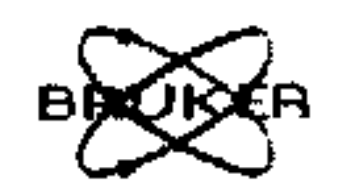

MI272S.112  
 AU PROG:  
 X23.AU  
 DATE 28-5-37  
 TIME 3:31

SA.NA PIW46977  
 SOLVENT CDCl3  
 SF 100.514  
 SY 74.0  
 Q1 4125.300  
 S1 65536  
 TD 65536  
 SW 25000.000  
 HZ/PT .763

PW 0.0  
 RD 0.0  
 AQ 1.311  
 RG 800  
 NS 96  
 TE 297

FW 31300  
 O2 6908.850  
 DP 16H CPJ

LB 1.000  
 GB .100  
 CX 30.00  
 CY 12.00  
 F1 220.001P  
 F2 -9.994P  
 HZ/CM 771.357  
 PPM/CM 7.667  
 SR -6122.00

D1 2.0000000  
 P9 102.00  
 S1 16H  
 D5 .0010000  
 S2 16H  
 P0 2.60  
 RGA  
 RD 0.0  
 PW 0.0  
 DE 27.50  
 NS 96  
 DS 2

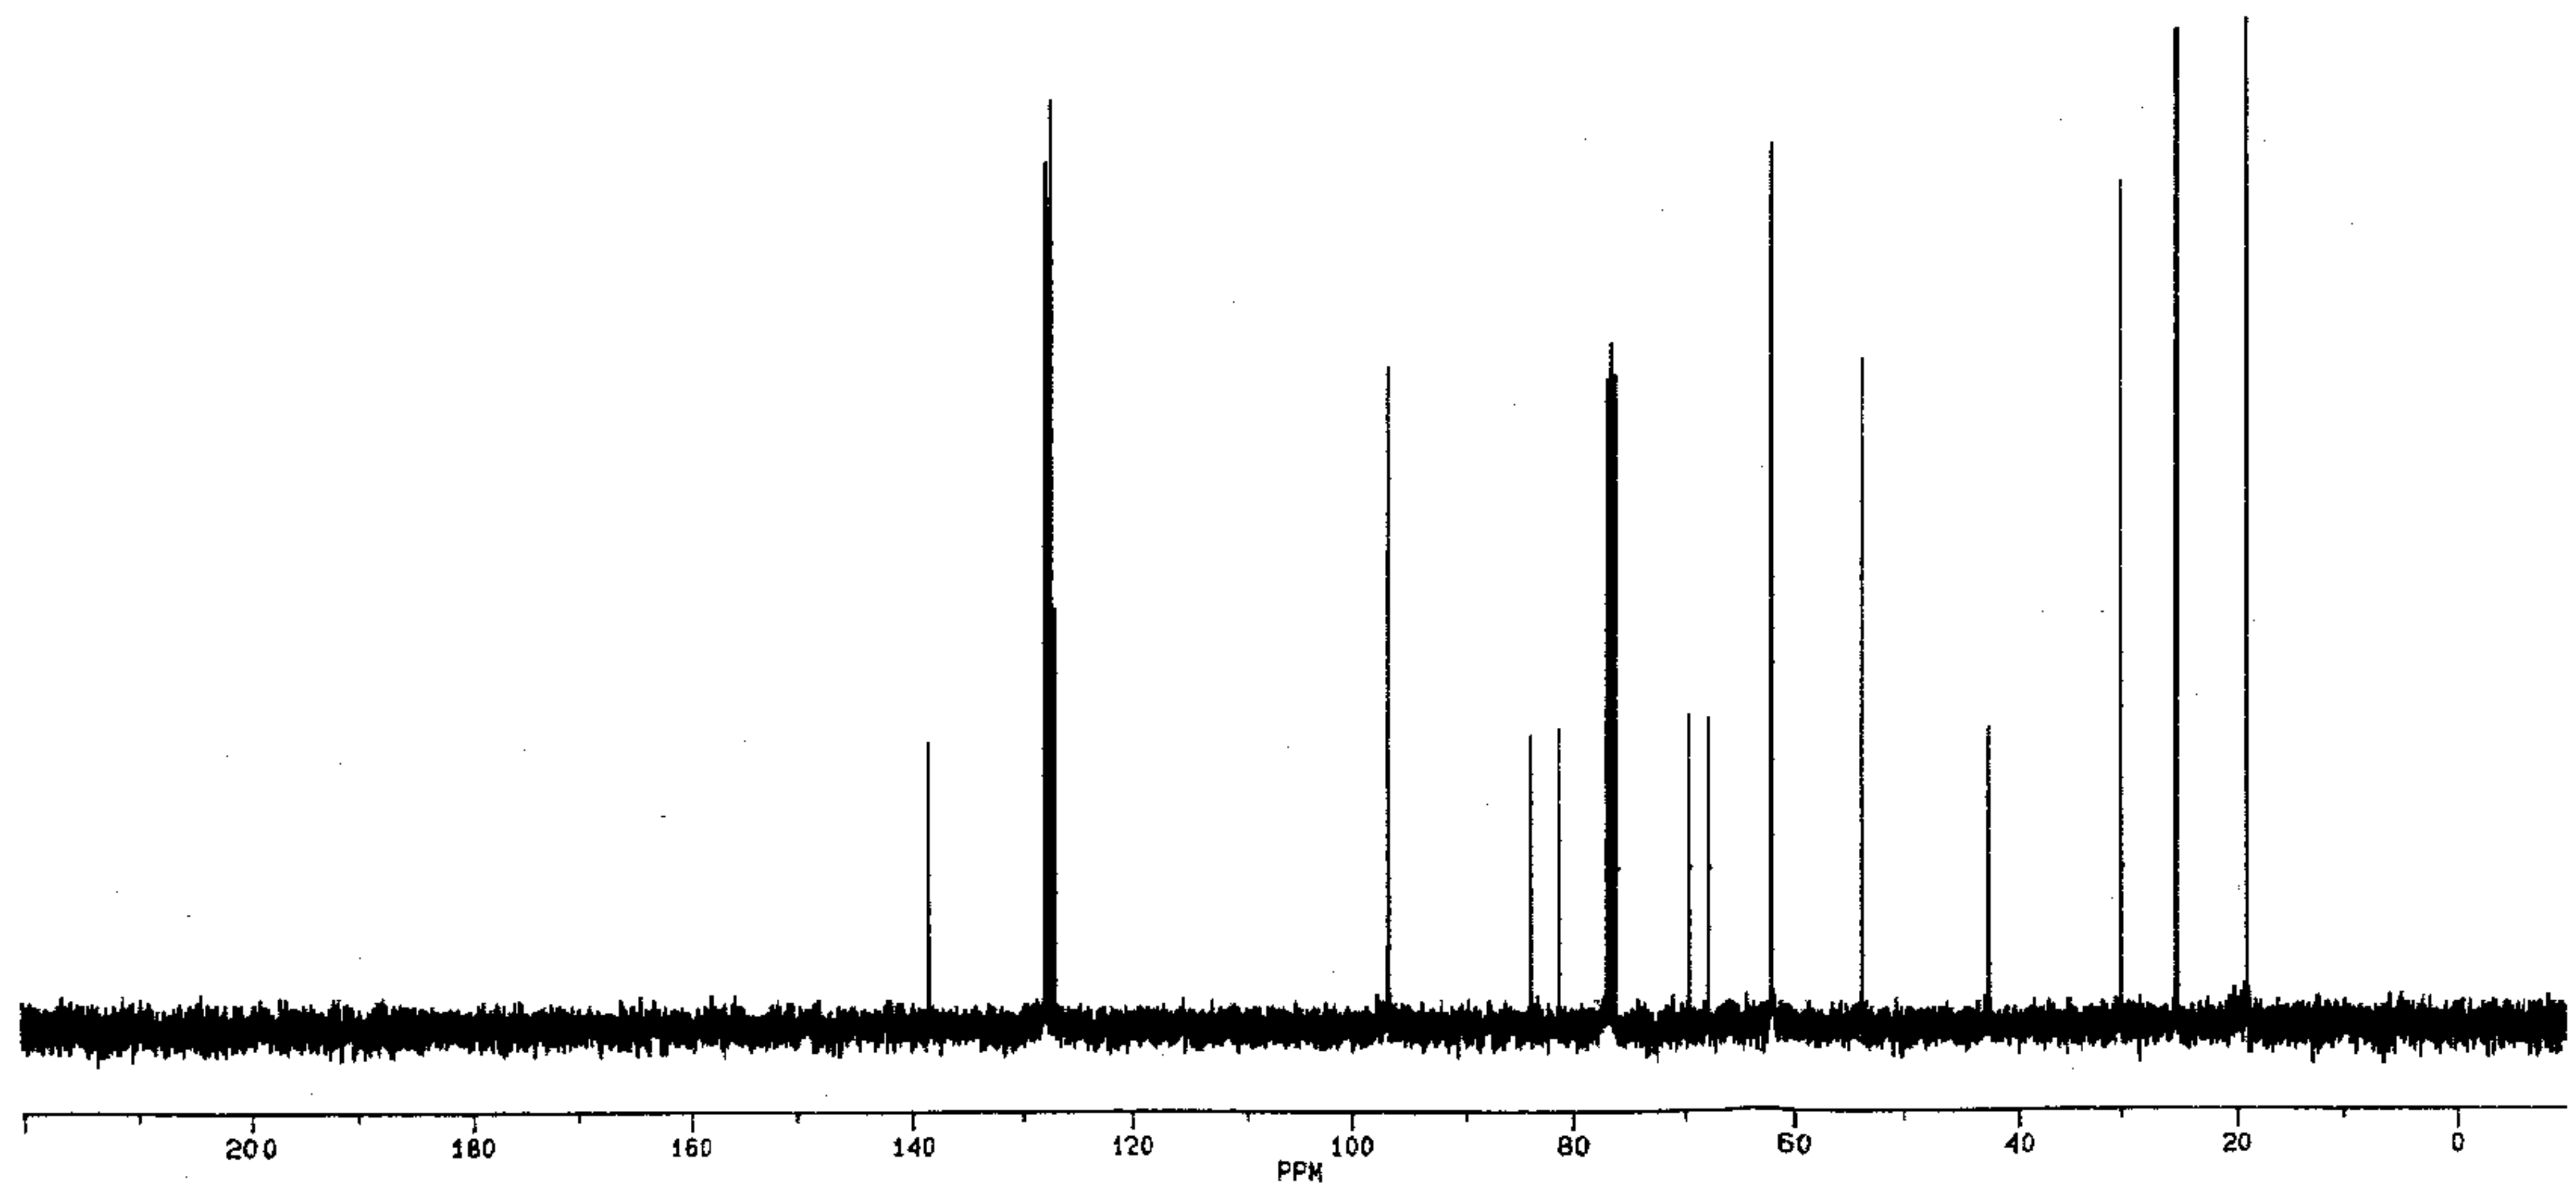



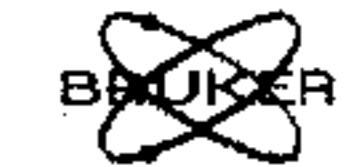

JU171S.109  
AU PROG:  
X00.AU  
DATE 17-6-97  
TIME 21:04

SA.NA PIW47227  
SOLVENT CDCl3  
SF 400.134  
SY 133.0  
D1 6908.850  
SI 32768  
TD 32768  
SW 8064.516  
HZ/PT .492

PW 0.0  
RD 0.0  
AQ 2.032  
RG 20  
NS 24  
TE 297

FW 10100  
O2 0.0  
OP 63L P0

LB 0.0  
GB 0.0  
CX 30.00  
CY 18.00  
F1 9.201P  
F2 -.798P  
HZ/CM 133.375  
PPM/CM .333  
SR 4404.93

D1 1.000000  
P0 4.10  
RGA  
RD 0.0  
PW 0.0  
DE 77.50  
NS 24  
DS 2

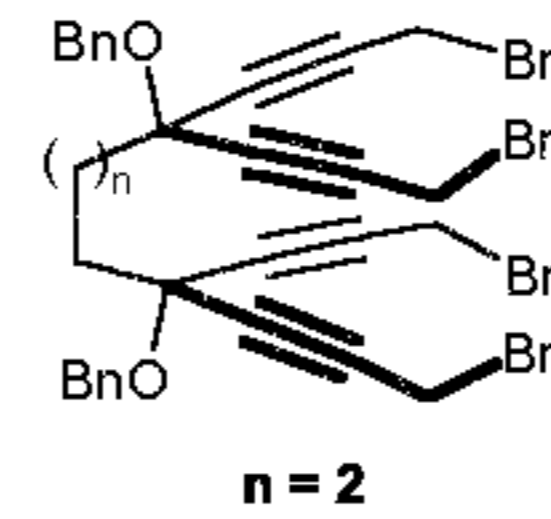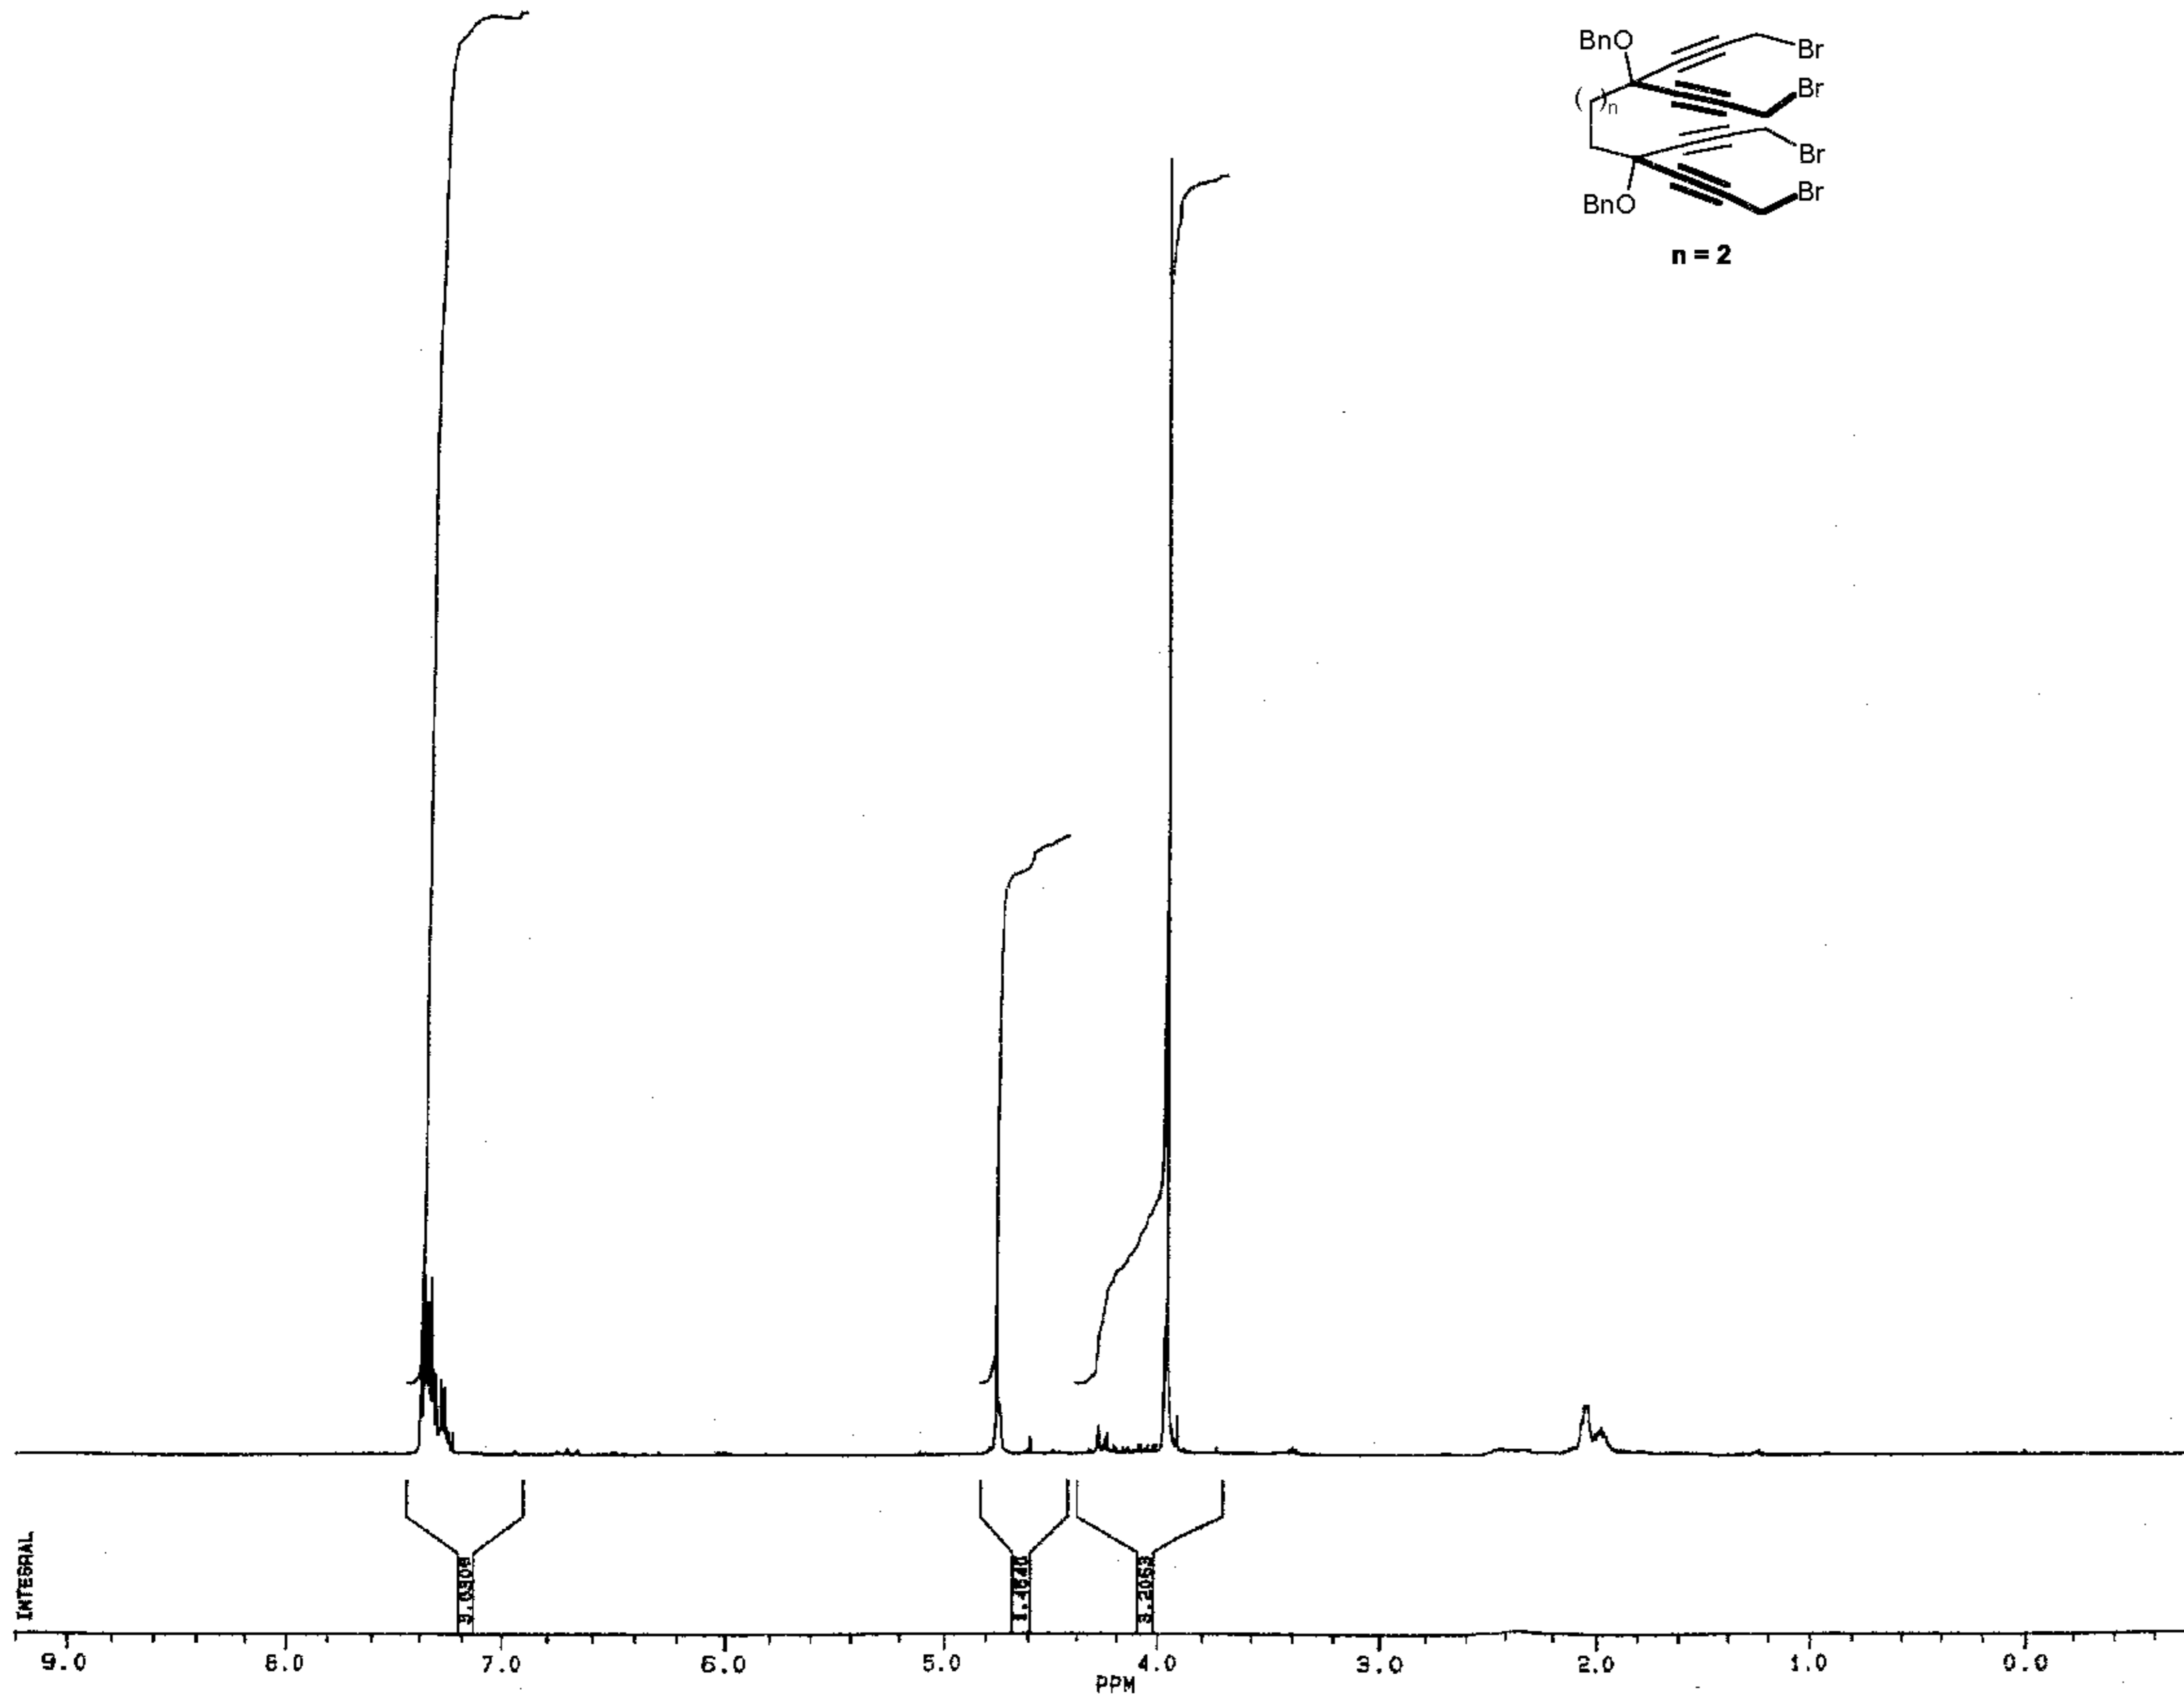

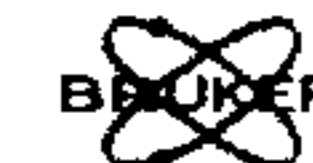

JU161F.106  
AU PRG:  
X02.AU  
DATE 16-6-97  
TIME 10:30

SA.NA HPIW837  
SA.NO JU16 106  
SOLVENT CDCl3  
SF 50.323  
SY 50.0  
O1 8386.390  
SI 32768  
TD 32768  
SW 12500.000  
HZ/PT .763

PW 0.0  
RO 0.0  
AQ 1.311  
RG 400  
NS 360  
TE 297

FW 15700  
O2 3154.530  
DP 17H D0

LB .600  
GB 0.0  
CX 35.00  
CY 10.00  
F1 210.007P  
F2 -4.988P  
HZ/CM 309.121  
PPM/CM 6.143  
SR 3318.26

D1 2.000000  
S1 16H  
P9 101.00  
D5 .0010000  
S2 17H  
P0 5.50  
RGA  
RD 0.0  
PW 0.0  
DE 50.00  
NS 360  
DS 2  
D2 .0034500

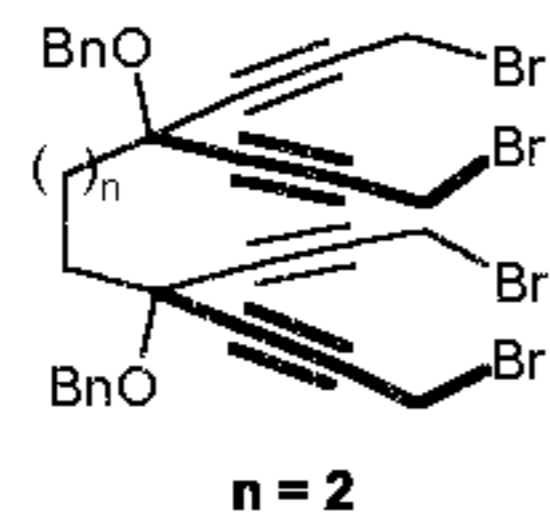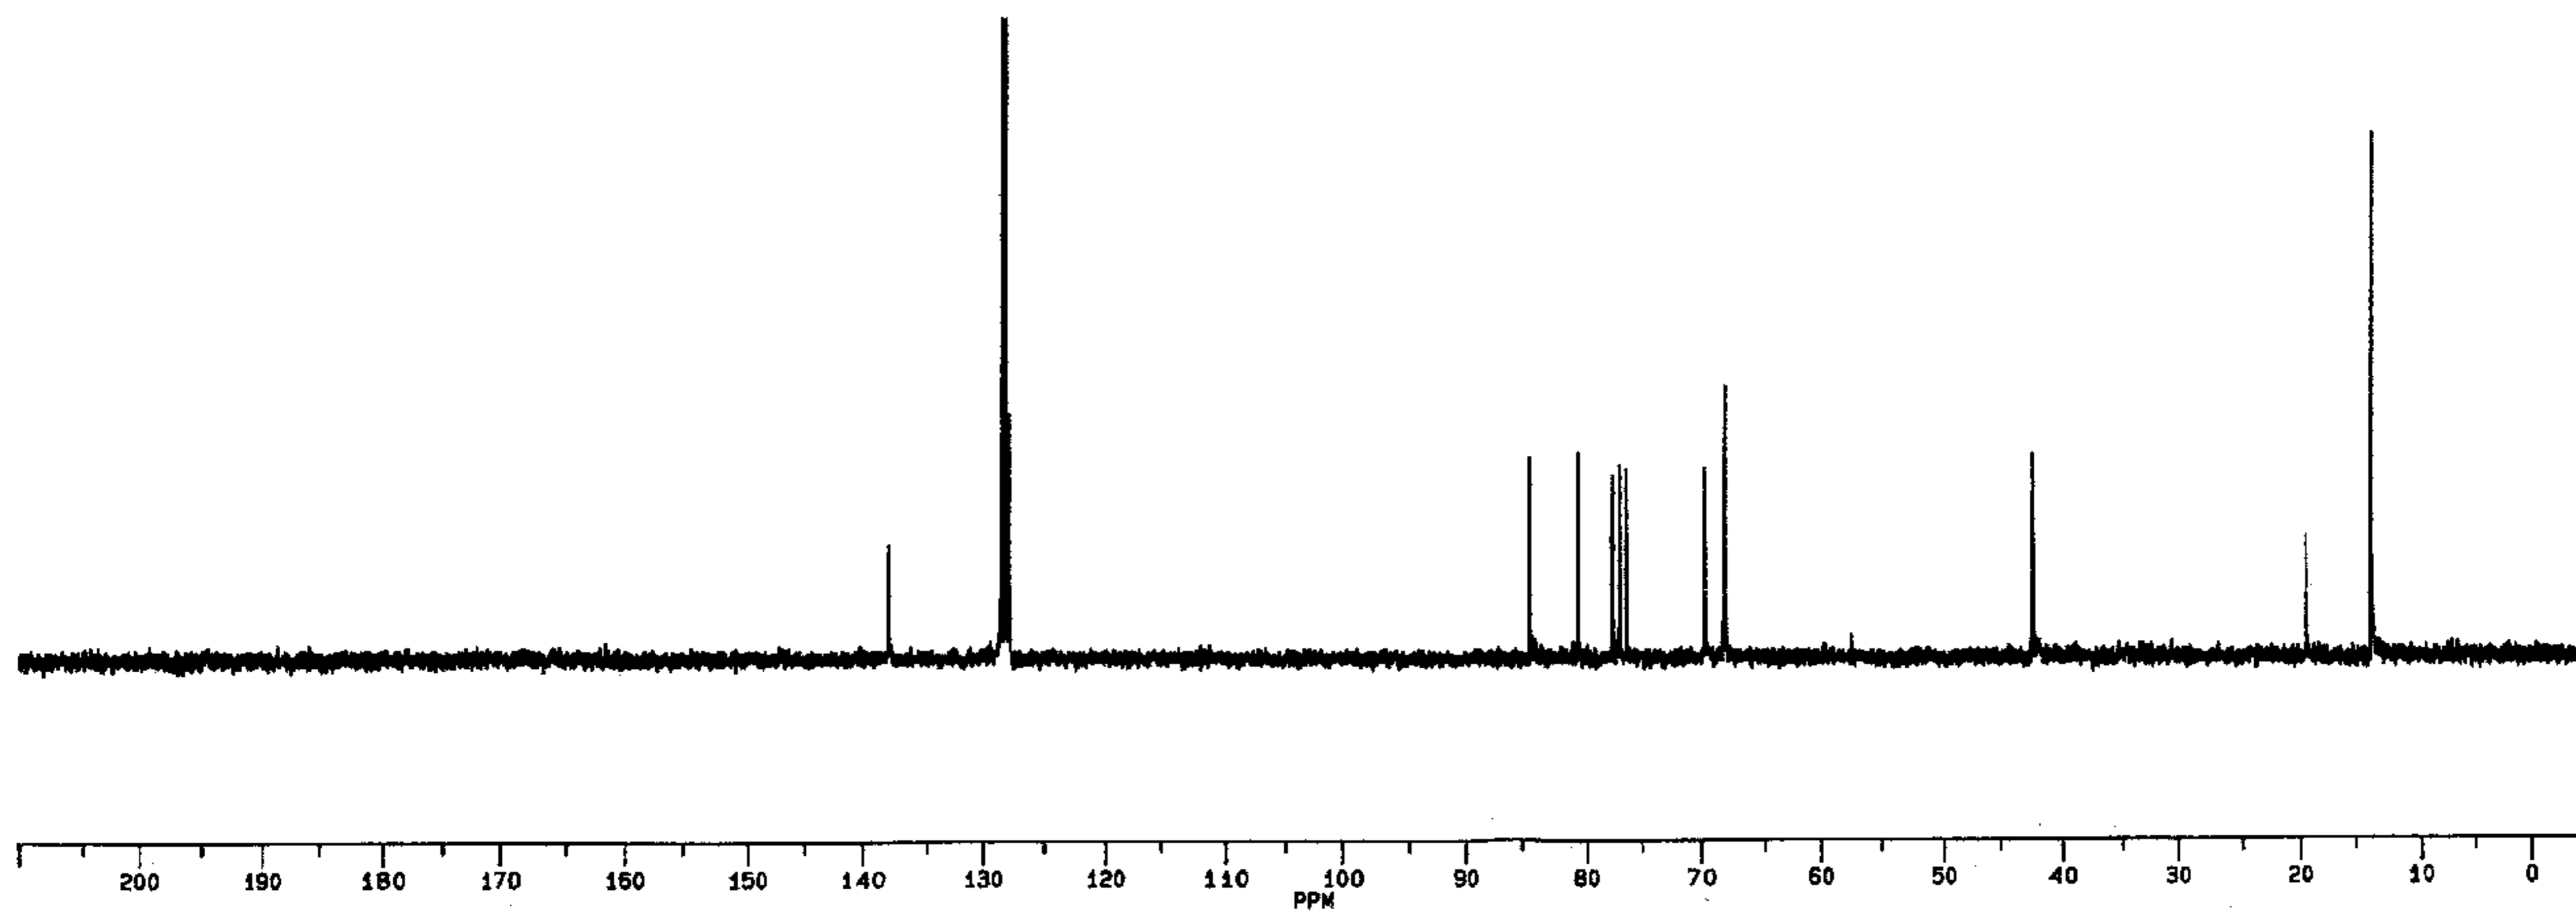

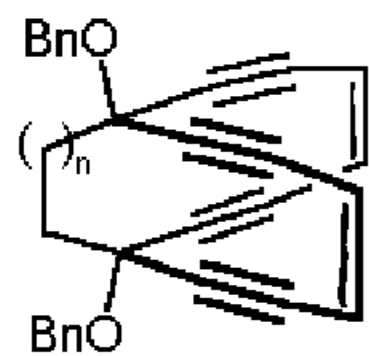

$n = 2$

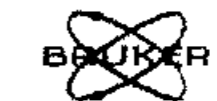

JU101S.108  
 AU PROG:  
 X00.AU  
 DATE 10-6-97  
 TIME 21:14

SA.NA PIW47154  
 SOLVENT CDCl3  
 SF 400.134  
 SY 133.0  
 O1 6908.850  
 SI 32768  
 TD 32768  
 SW 8064.516  
 HZ/PT .492

PW 0.0  
 RD 0.0  
 AQ 2.032  
 RG 100  
 NS 24  
 TE 297

FW 10100  
 O2 0.0  
 DP 63L P0

LB 0.0  
 GB 0.0  
 CX 30.00  
 CY 18.00  
 F1 9.201P  
 F2 -.798P  
 HZ/CM 133.375  
 PPM/CM .333  
 SR 4423.14

D1 1.000000  
 P0 4.10  
 RGA  
 RD 0.0  
 PW 0.0  
 DE 77.50  
 NS 24  
 DS 2

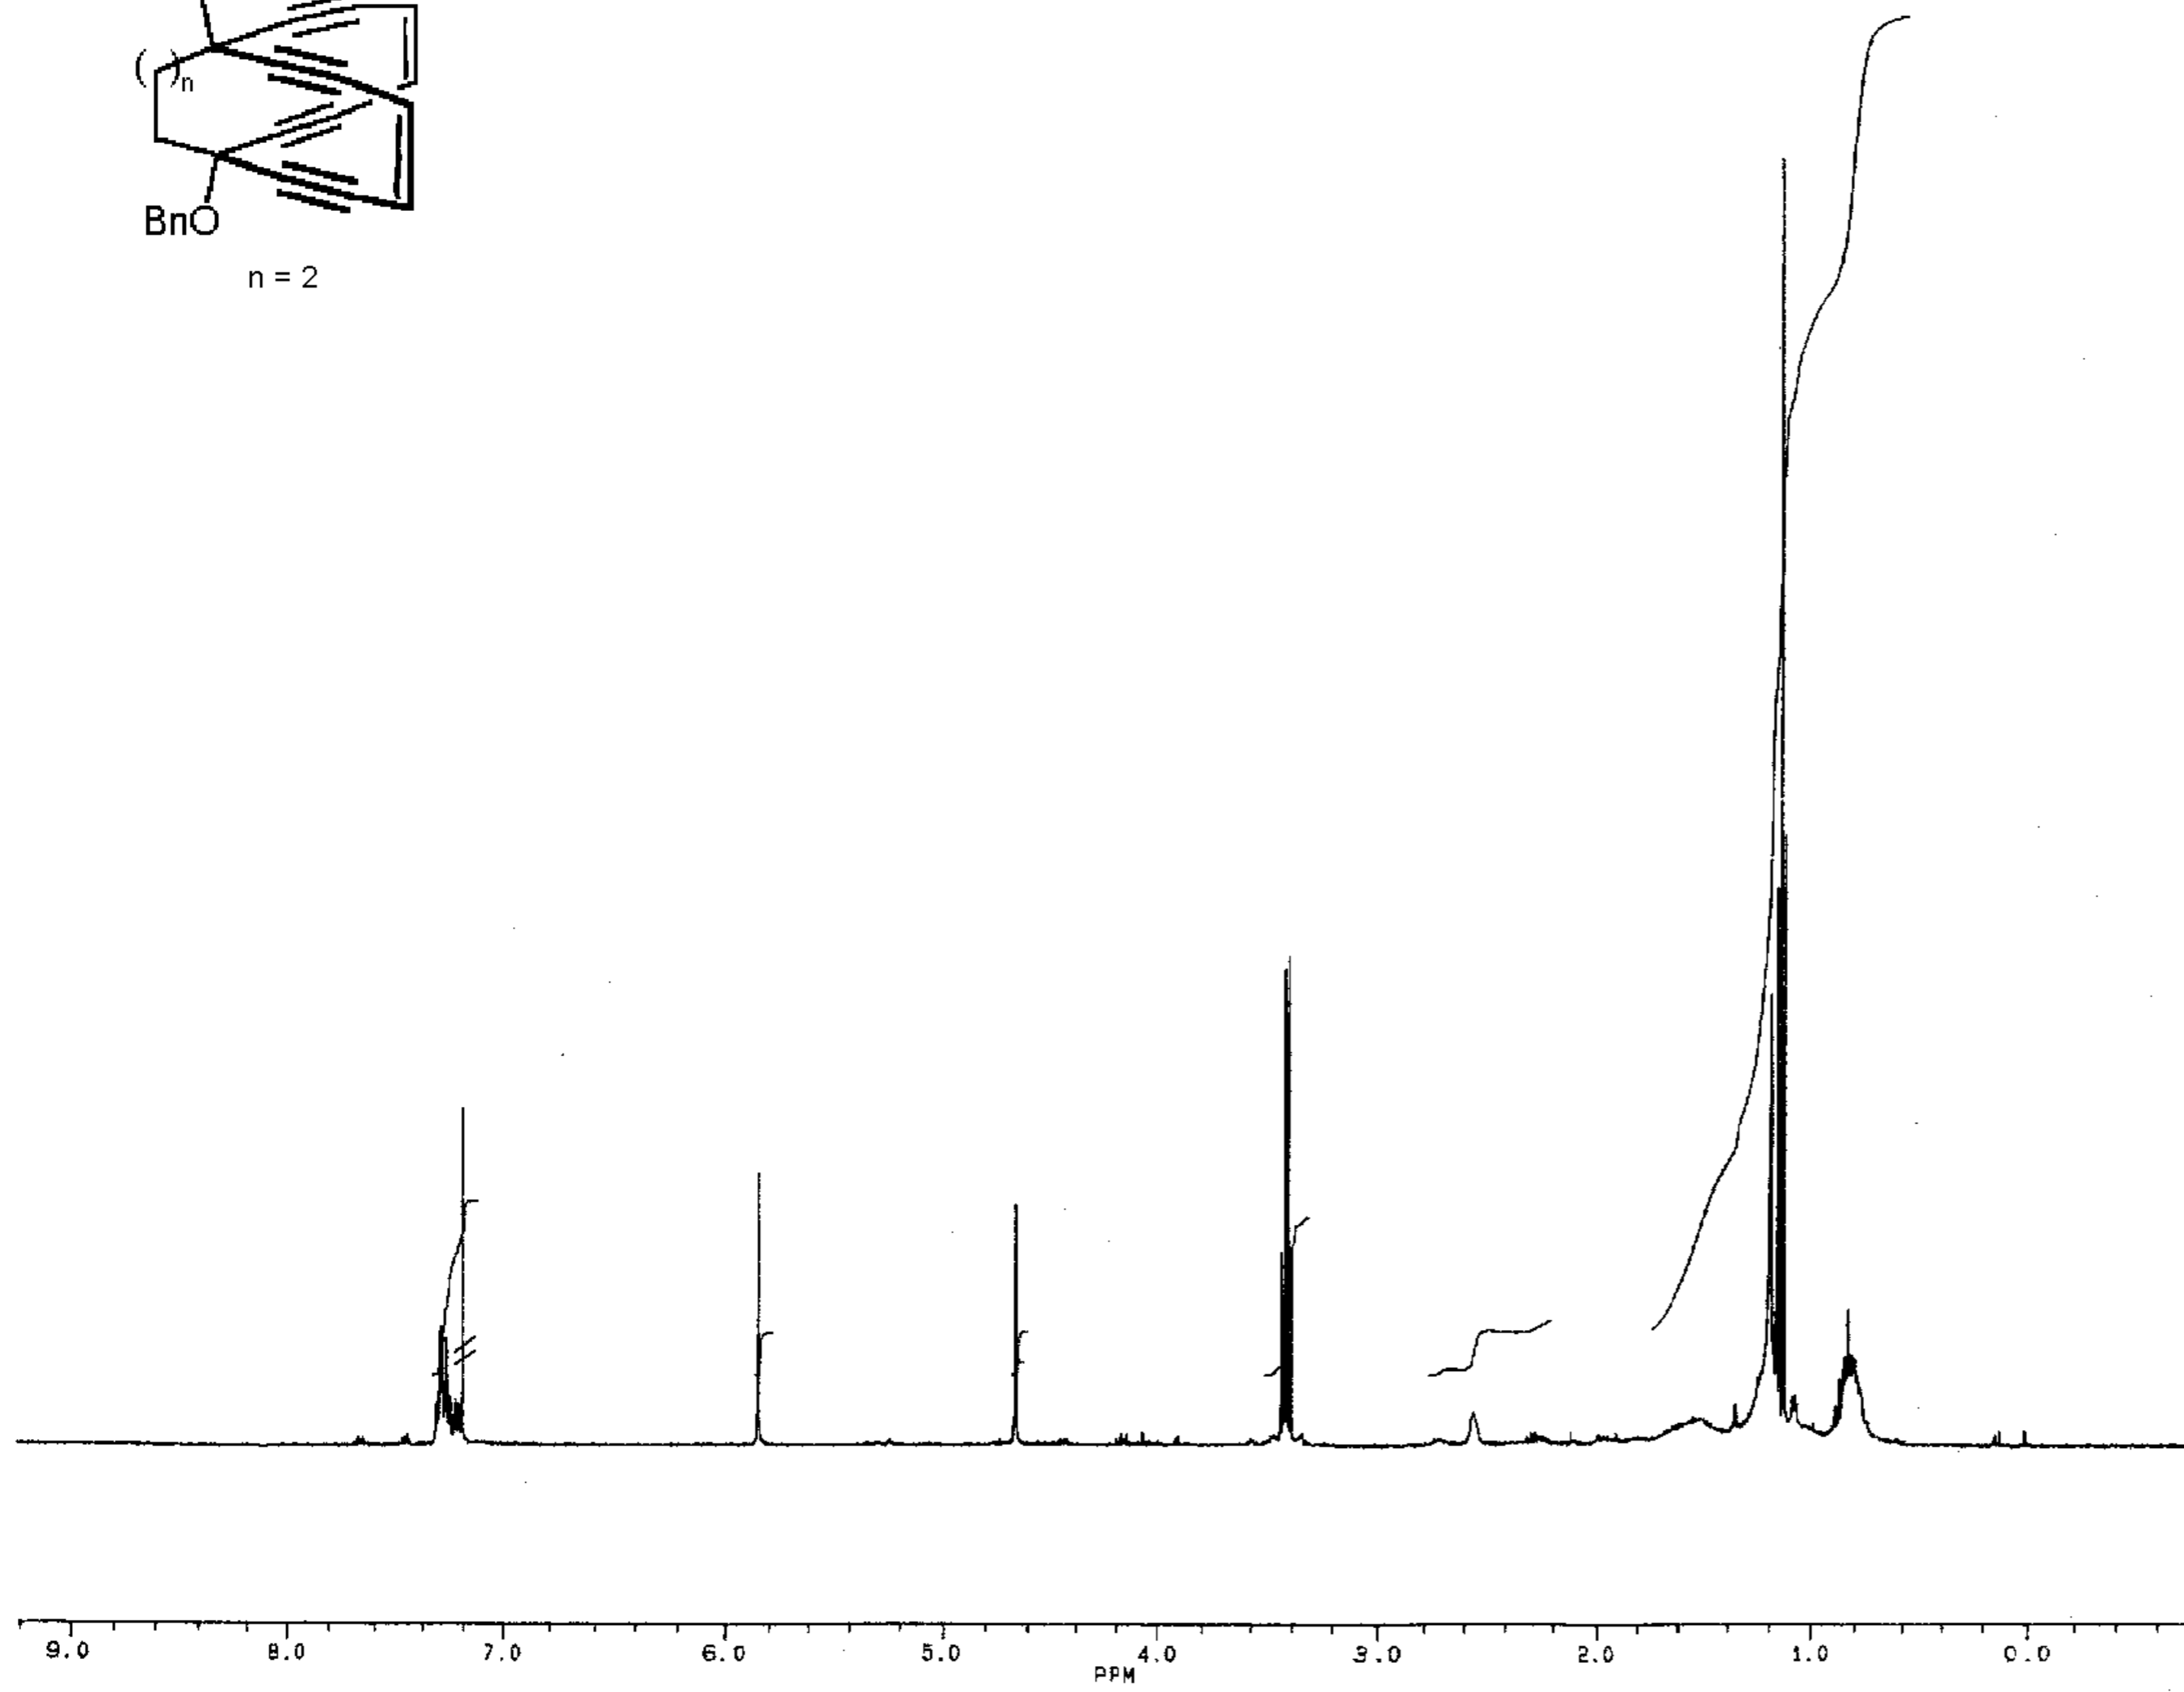

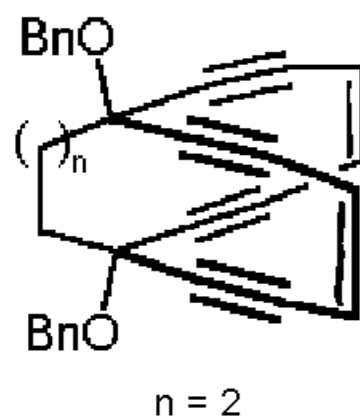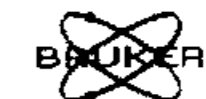

JU102S.108  
 AU PROG:  
 X23.AU  
 DATE 10-6-97  
 TIME 23:46

SA.NA PIW47154  
 SOLVENT CDC13  
 SF 100.614  
 SY 74.0  
 O1 4125.800  
 SI 65536  
 TD 65536  
 SW 25000.000  
 HZ/PT .753

PW 0.0  
 RD 0.0  
 AG 1.311  
 RG 800  
 NS 2016  
 TE 297

FW 31300  
 O2 6908.850  
 DP 16H CPD

LB 1.000  
 GB .100  
 CX 30.00  
 CY 12.00  
 F1 220.001P  
 F2 -9.994P  
 HZ/CM 771.357  
 PPM/CM 7.657  
 SR -6122.00

O1 2.000000  
 P9 102.00  
 S1 16H  
 O5 .0010000  
 S2 16H  
 P0 2.50  
 RGA  
 RD 0.0  
 PW 0.0  
 DE 27.50  
 NS 2016  
 DS 2

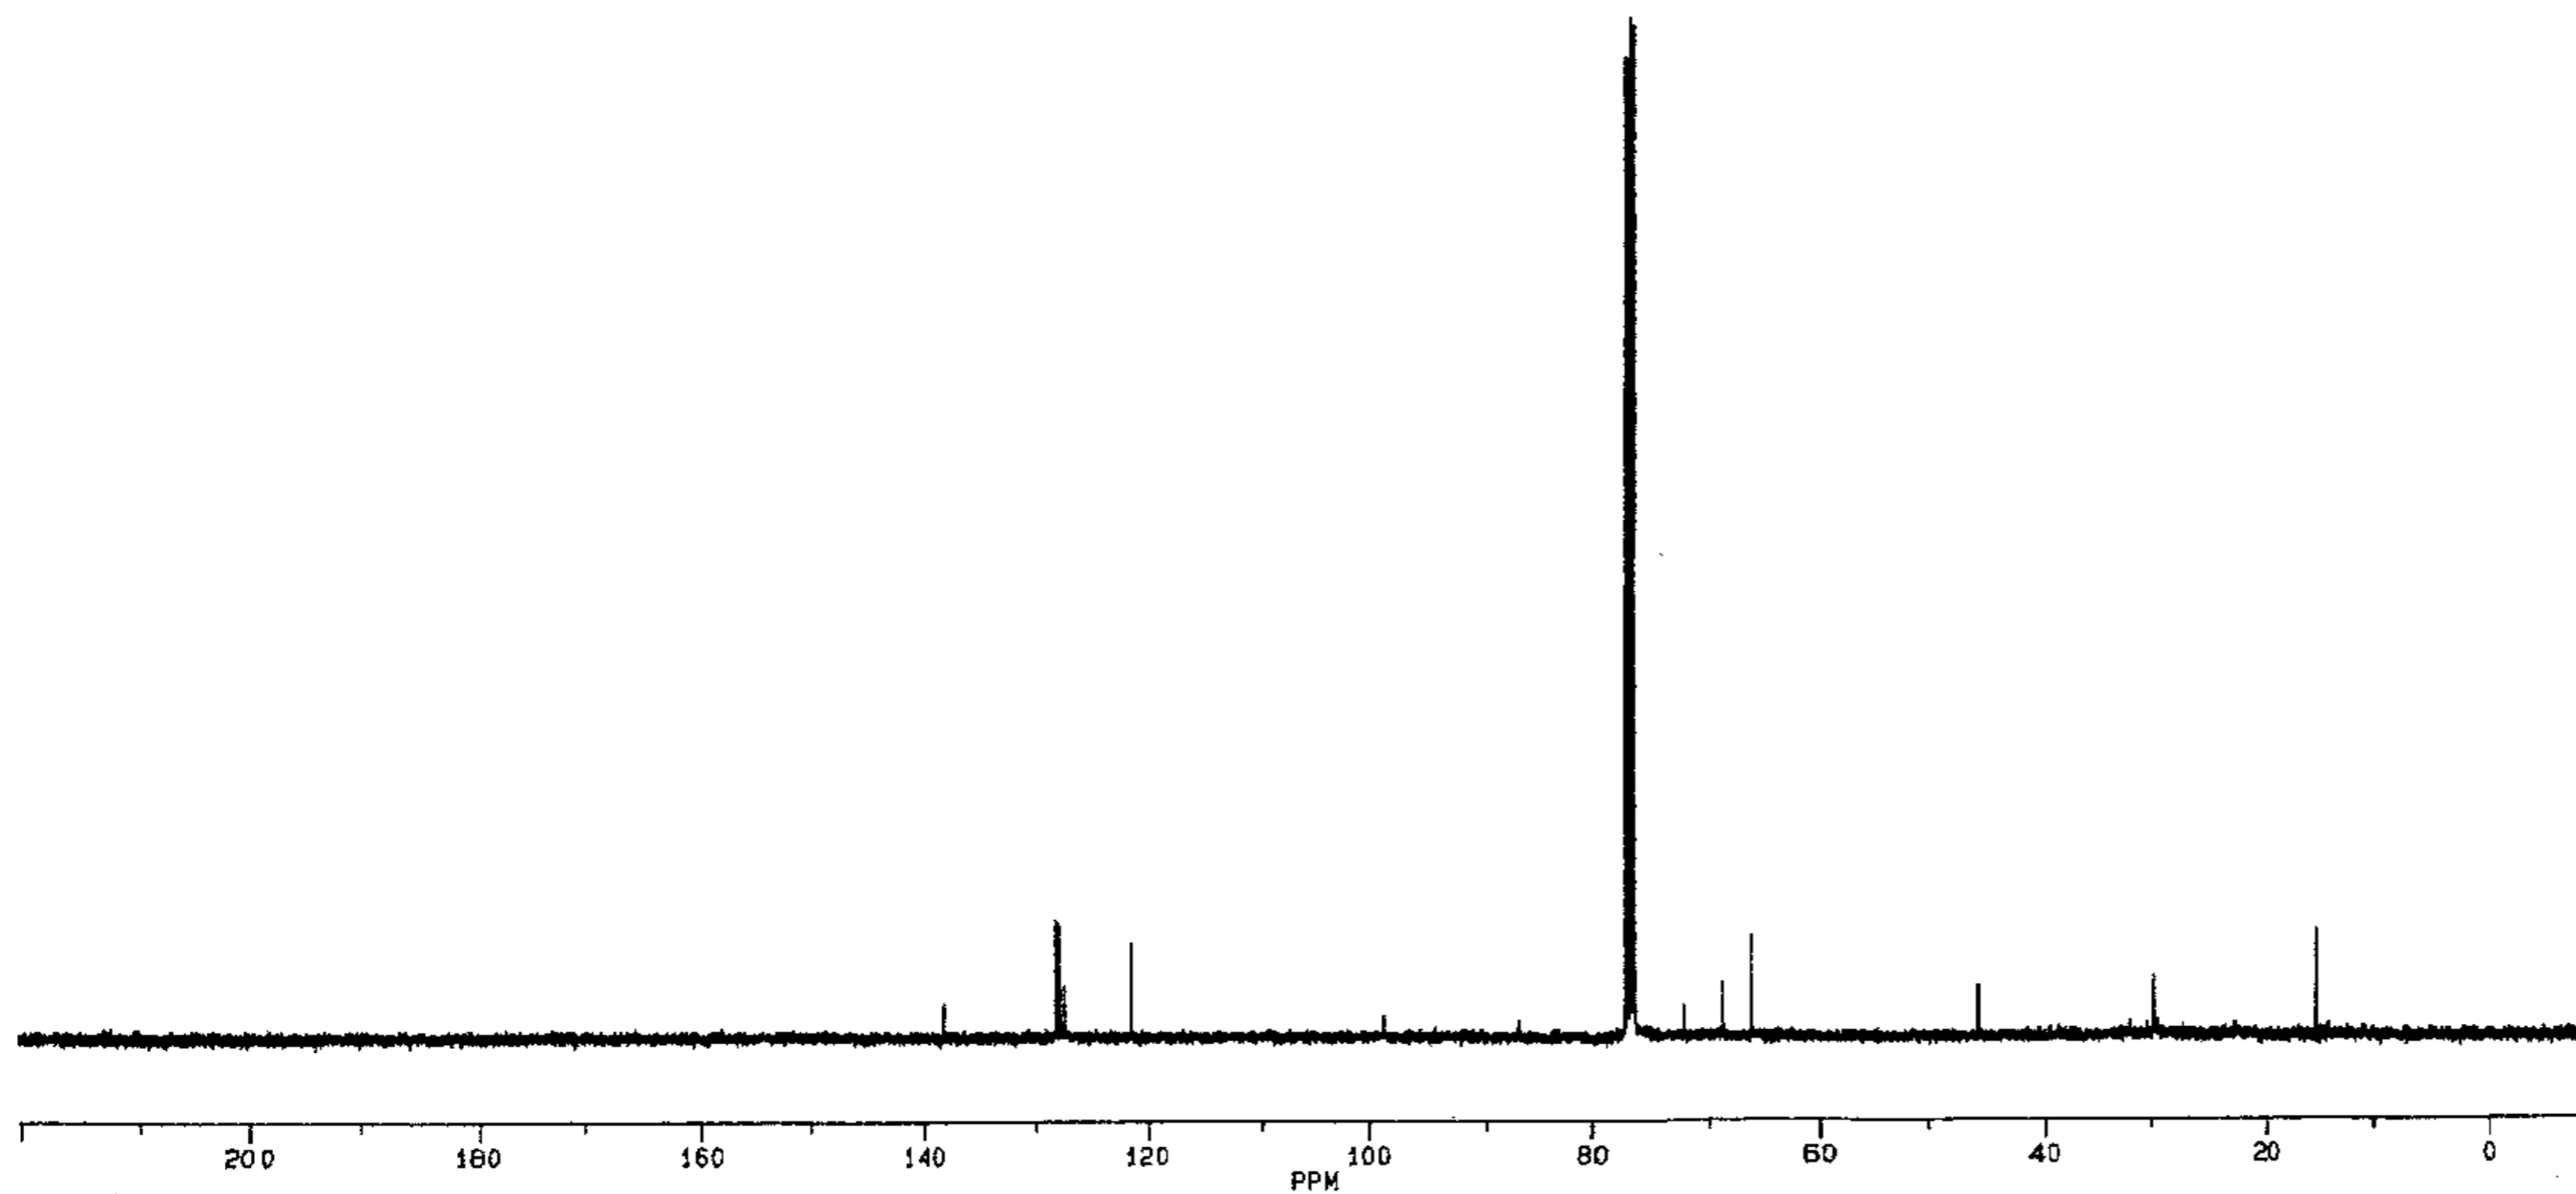

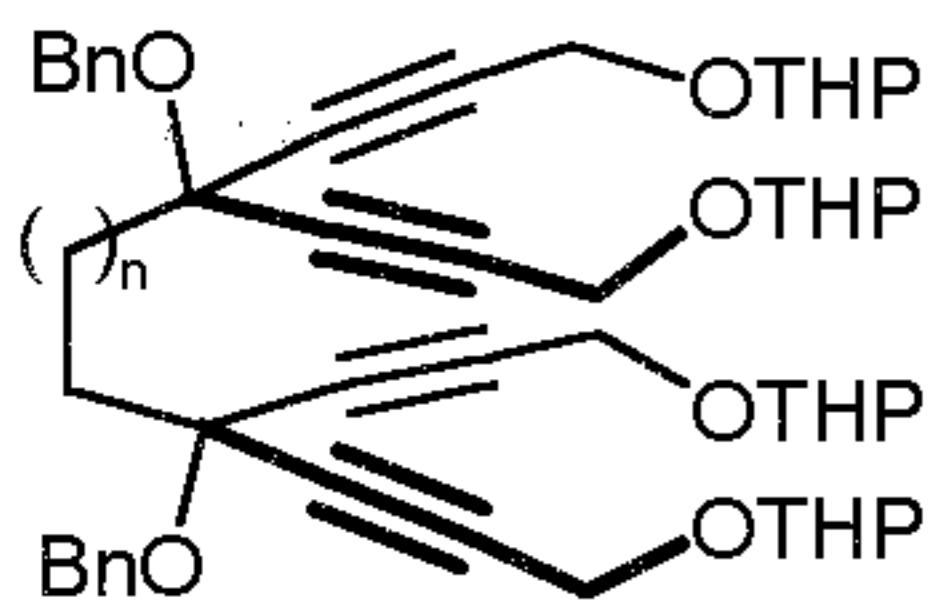

n=1

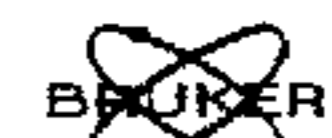

JU231S.102  
 AU PROG:  
 X00.AU  
 DATE 23-6-97  
 TIME 16:42

SA.NA PIW47291  
 SOLVENT CDC13  
 SF 400.134  
 SY 133.0  
 Q1 6908.850  
 SI 32768  
 TD 32768  
 SW 8064.516  
 HZ/PT .492

PW 0.0  
 RD 0.0  
 AQ 2.032  
 RG 20  
 NS 24  
 TE 297

FW 10100  
 Q2 0.0  
 DP 53L P0

LB 0.0  
 GB 0.0  
 CX 30.00  
 CY 18.00  
 F1 9.201P  
 F2 -.798P  
 HZ/CM 133.375  
 PPM/CM .333  
 SR 4394.60

D1 1.000000  
 PC 4.10  
 RGA  
 RD 0.0  
 PW 0.0  
 DE 77.50  
 NS 24  
 DS 2

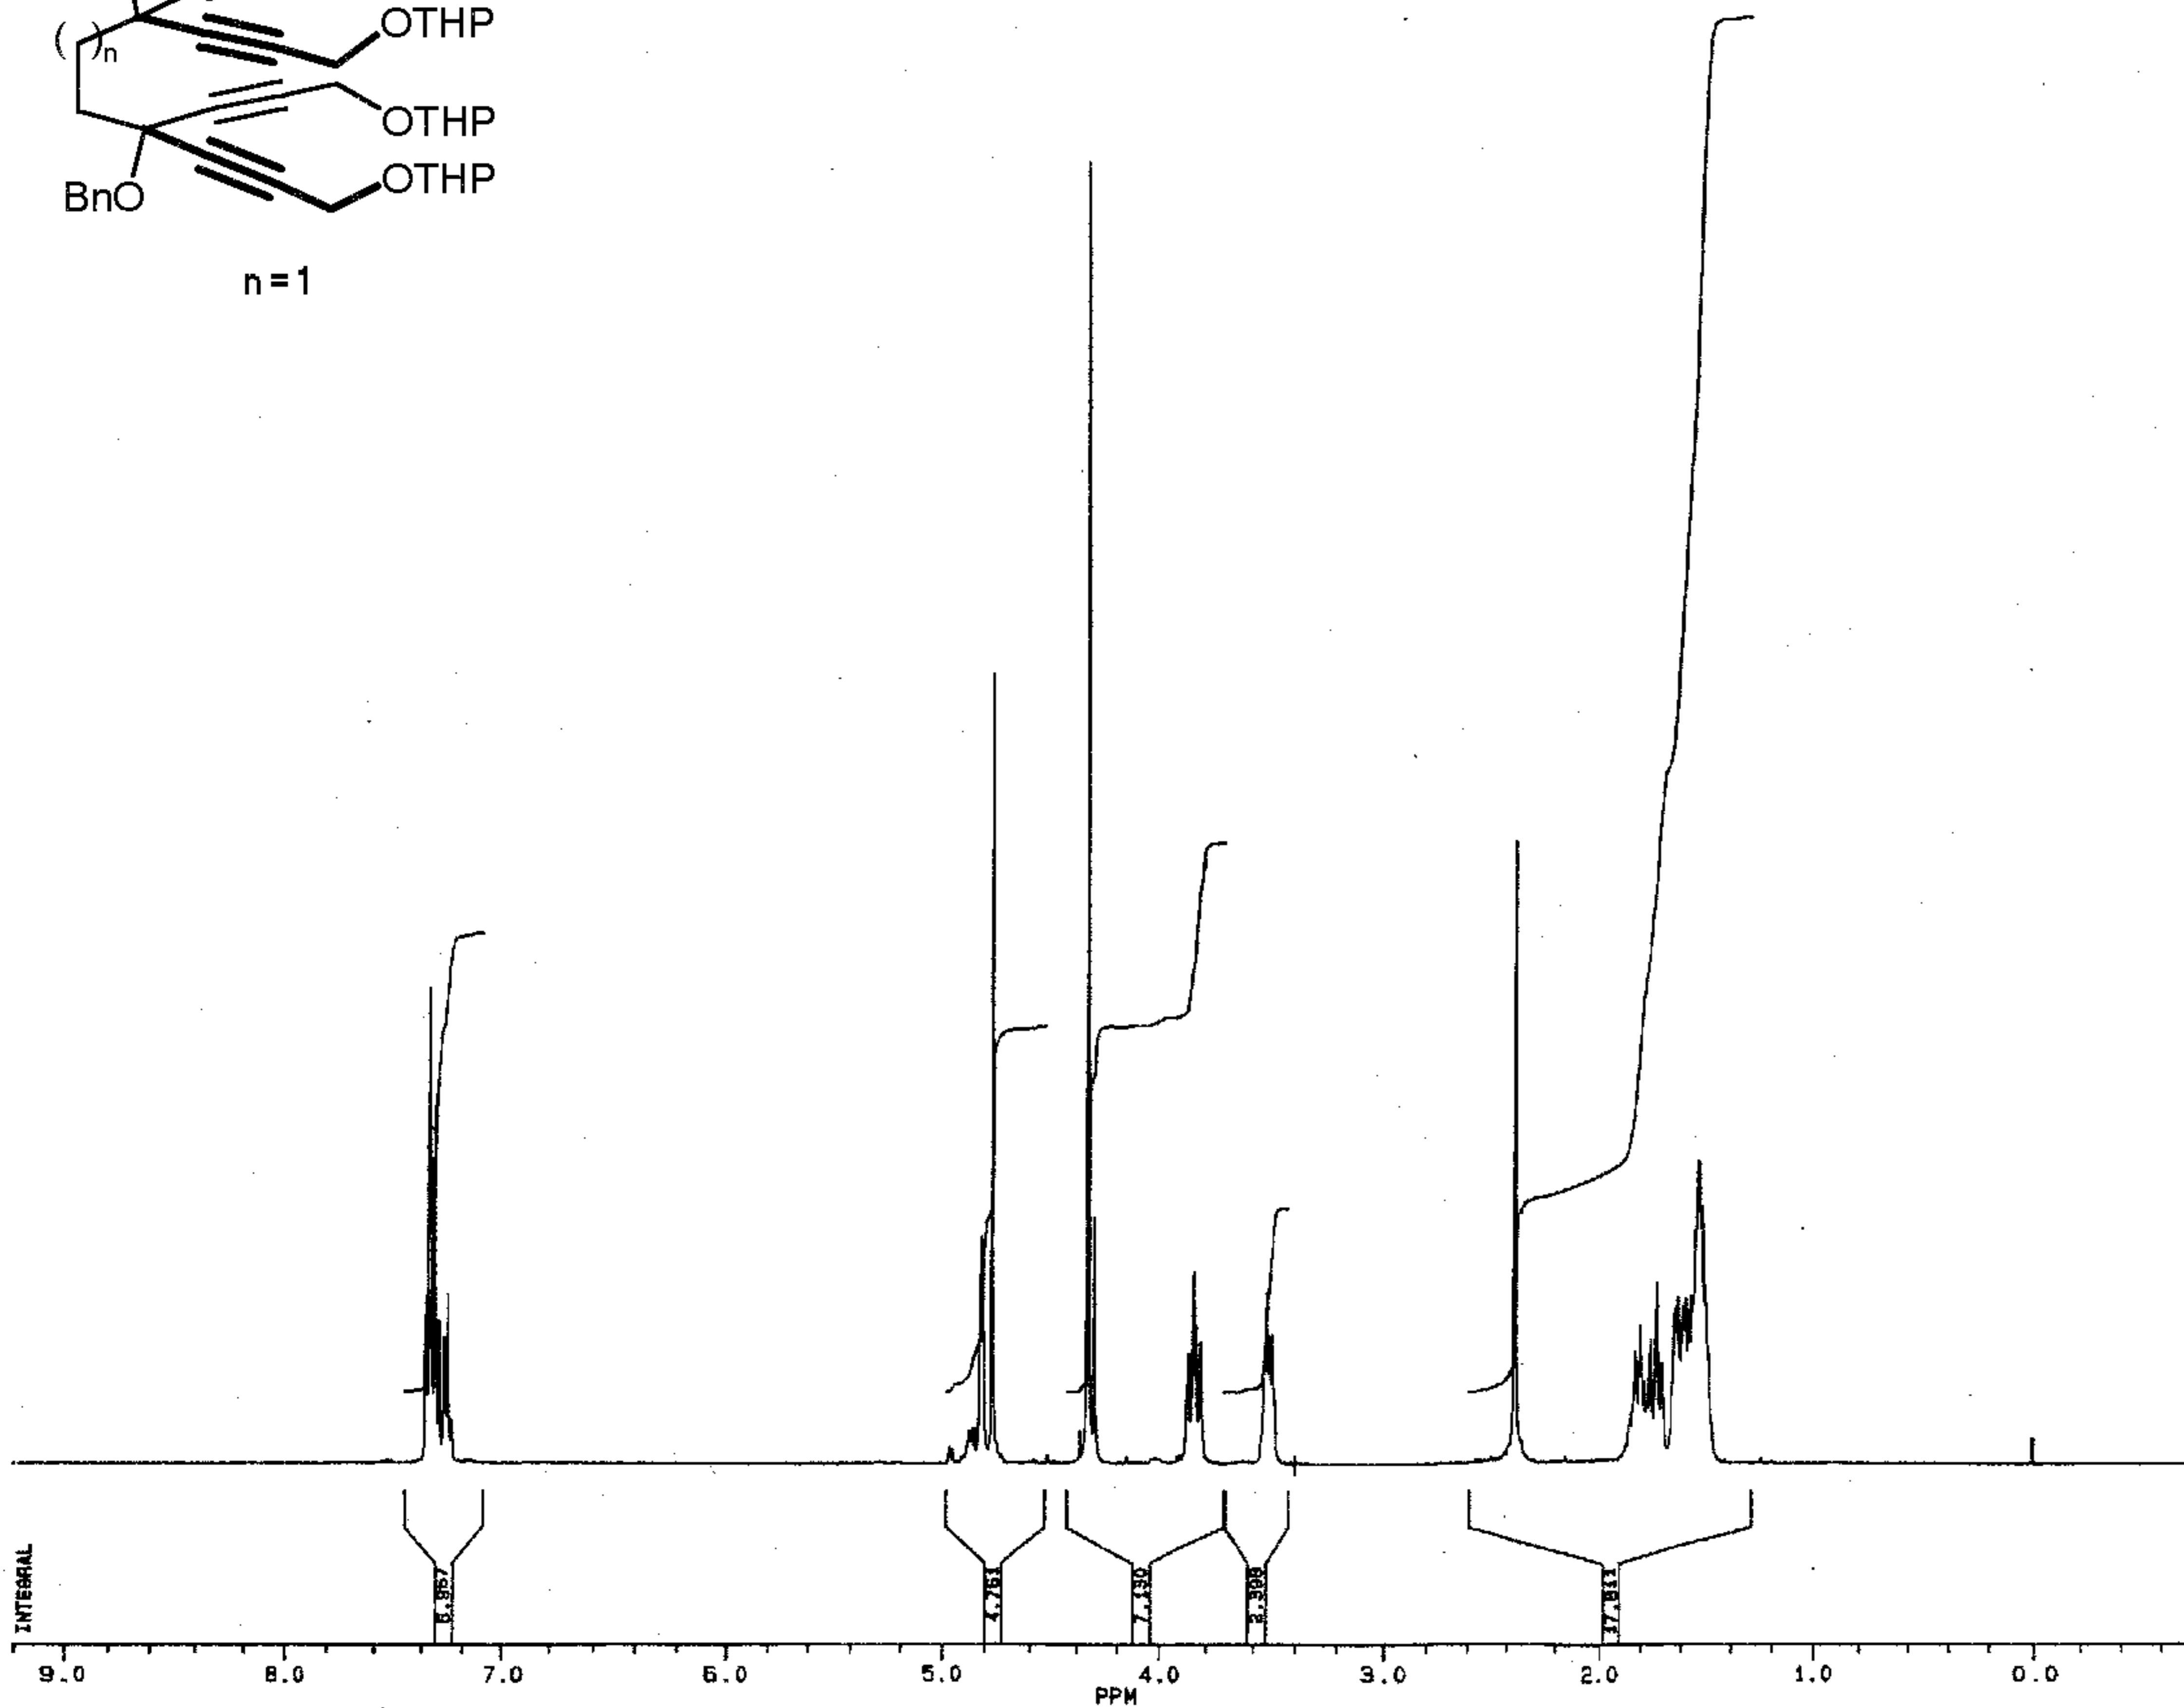

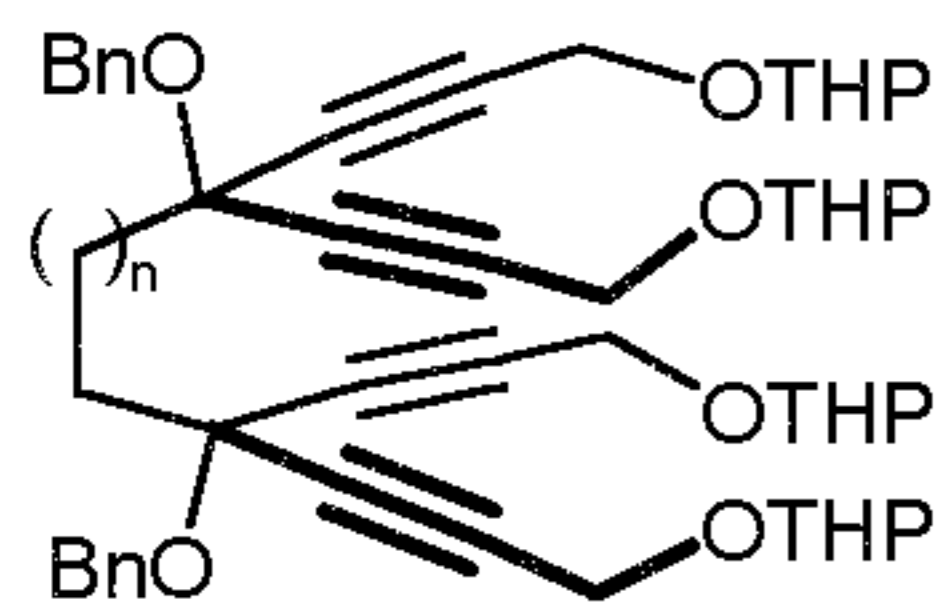

$n=1$

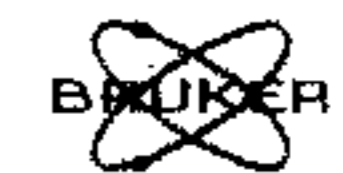

JU232S.102  
 AU PROG:  
 X23.AJ  
 DATE 23-6-97  
 TIME 15:50

SA.NA PIW47291  
 SOLVENT CDCl3  
 SF 100.614  
 SY 74.0  
 O1 4125.800  
 SI 65536  
 TD 65536  
 SW 25000.000  
 HZ/PT .763

PW 0.0  
 RD 0.0  
 AQ 1.311  
 RG 300  
 NS 96  
 TE 297

FW 31300  
 O2 6908.850  
 DP 164 CPD

LB 1.000  
 GB .100  
 CX 30.00  
 CY 12.00  
 F1 220.001P  
 F2 -9.994P  
 HZ/CM 771.357  
 PPM/CM 7.667  
 SR -6122.00

D1 2.000000  
 P9 102.00  
 S1 15H  
 D5 .0010000  
 S2 15H  
 P0 2.50  
 RGA  
 RD 0.0  
 PW 0.0  
 DE 27.50  
 NS 96  
 DS 2

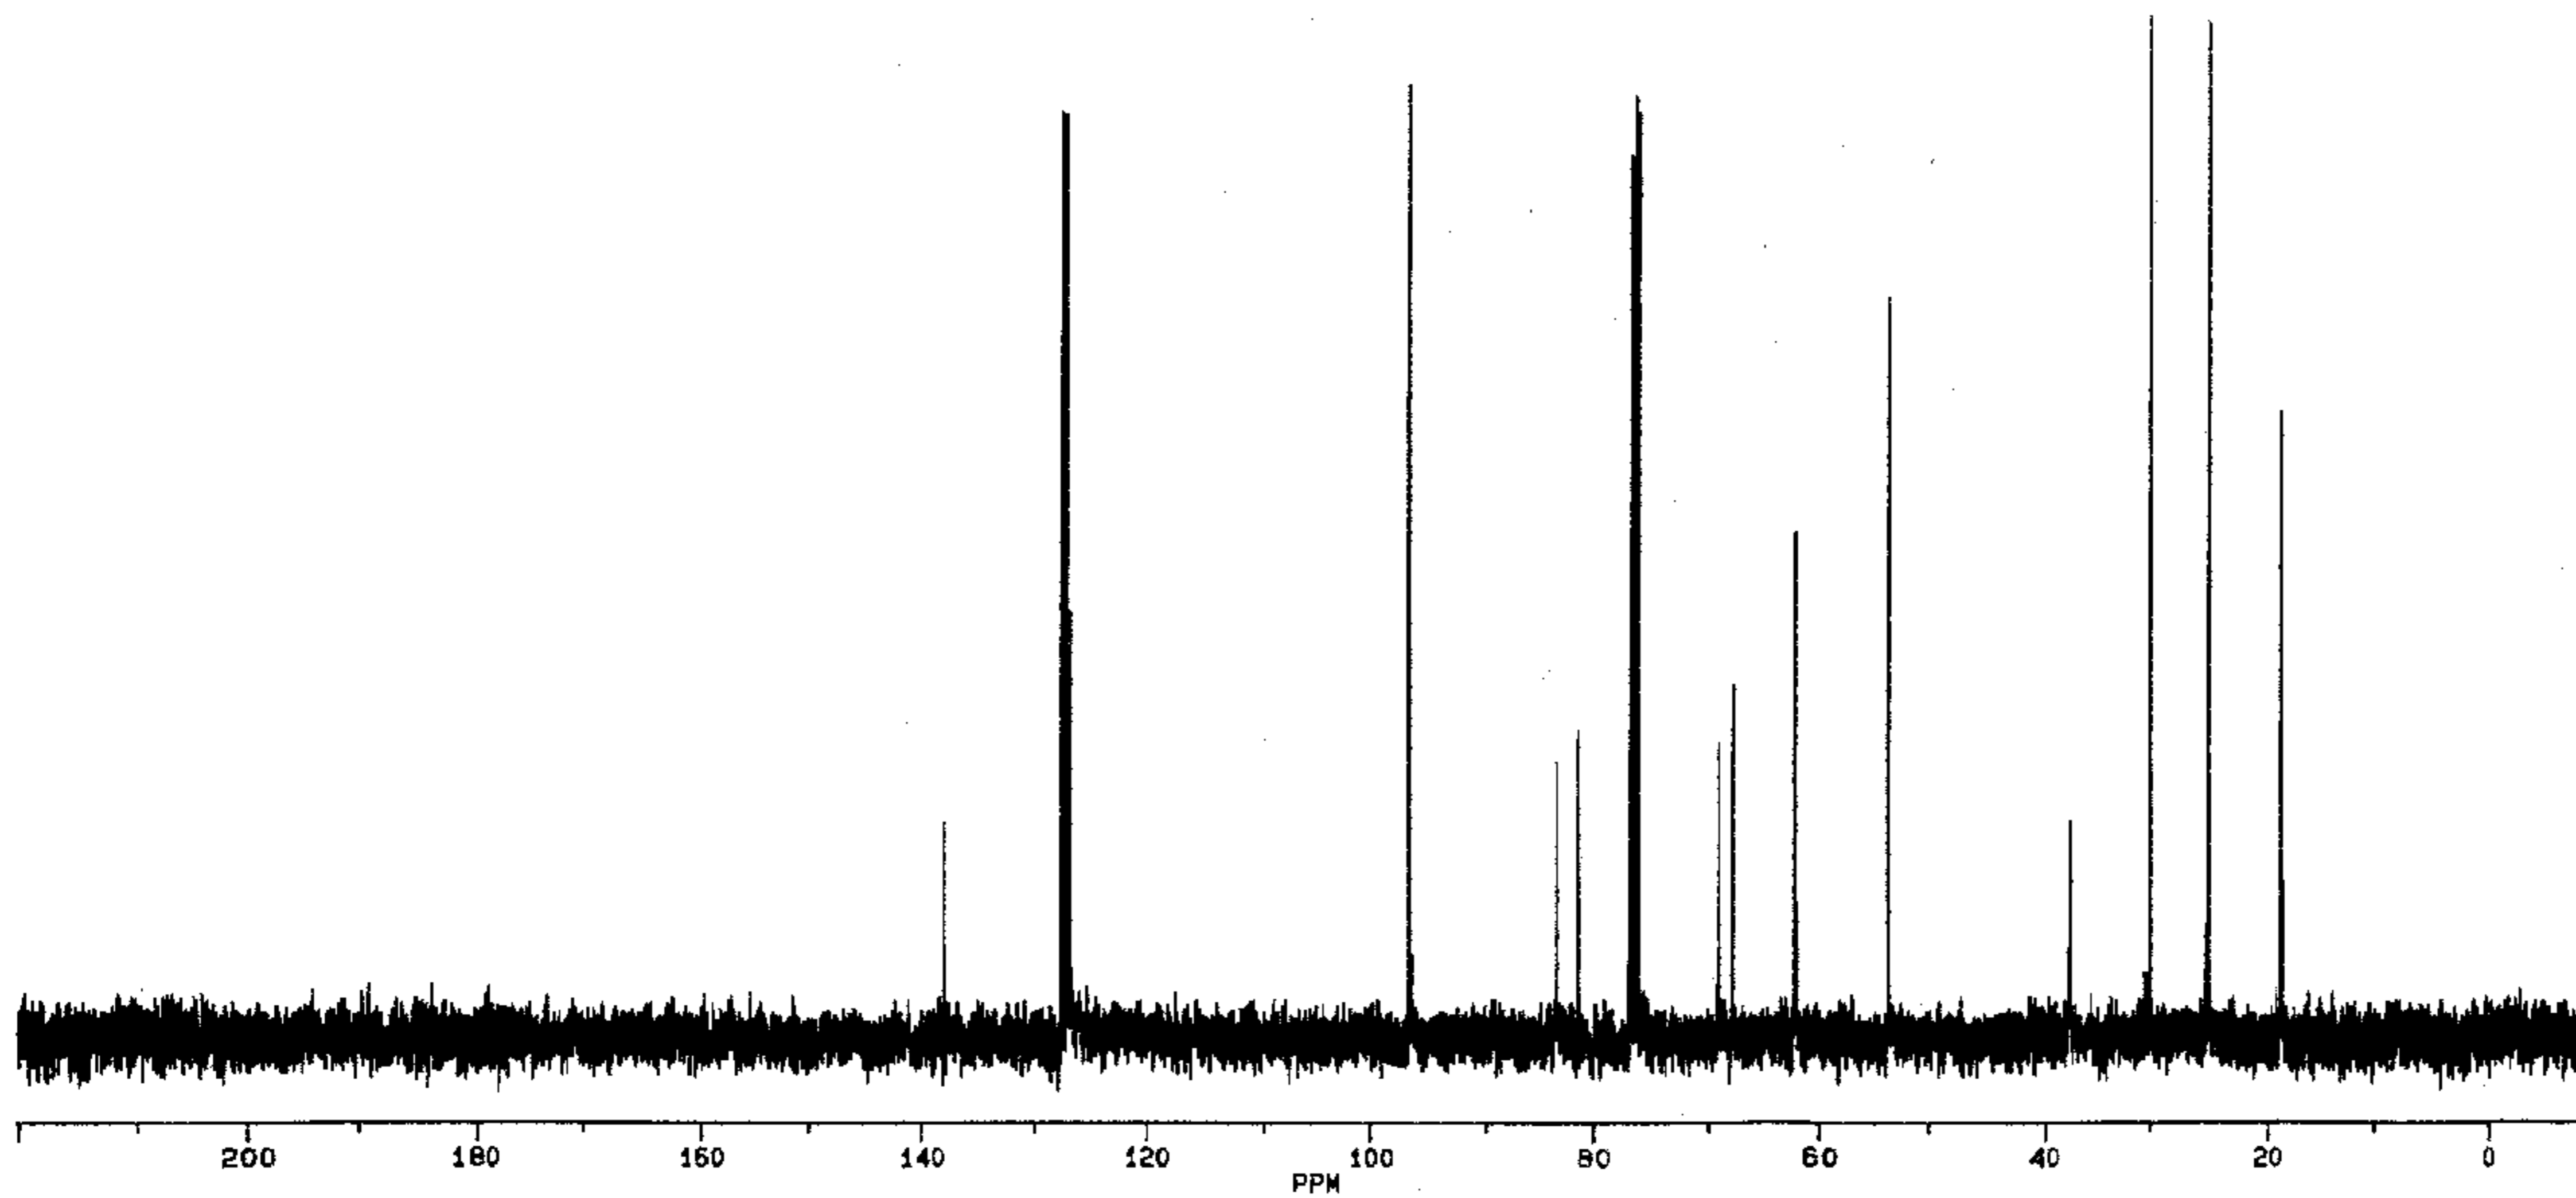

Supplement: b101572a.pdf [file b101572a.pdf]
